# Supplementary material for: Global cooling induced by biophysical effects of bioenergy crop cultivation
Source: PubMed Central journal article supplement (PMC8668960; doi:10.1038/s41467-021-27520-0), 2021-12-13
Supplement: 41467_2021_27520_MOESM1_ESM.pdf [file 41467_2021_27520_MOESM1_ESM.pdf]

# 1 **Global cooling induced by biophysical effects of** 2 **bioenergy crop cultivation**

3

## 4 **Supplementary Information**

### 5 **Supplementary Methods 1. Brief introduction to the coupled model**

6 The coupled Earth system model IPSL-CM (version 6.0.10, a modified version of IPSL-  
7 CM6A-LR)<sup>1</sup> was used to simulate the biophysical feedbacks of bioenergy crop  
8 cultivation. The land-surface model (ORCHIDEE)<sup>2</sup> and the atmosphere model (LMDZ,  
9 version 6)<sup>3,4</sup> serve as two components of IPSL-CM, and they were coupled through  
10 exchange of information at the interface. Other components of IPSL-CM (e.g., ocean  
11 and sea-ice models) were not activated during our simulations, because we mainly focus  
12 on the air temperature change from the perspective of the land energy budget. We  
13 therefore prescribed the sea surface temperature and sea ice to isolate energy changes  
14 over the land surface. Seasonal cycles, with no interannual variations, of sea surface  
15 temperature and sea ice were prescribed with climatological data from the Atmospheric  
16 Model Intercomparison Project (AMIP; [www.pcmdi.llnl.gov/projects/amip](http://www.pcmdi.llnl.gov/projects/amip)).

17 We used ORCHIDEE-MICT-BIOENERGY<sup>5</sup> to replace the old ORCHIDEE version in  
18 the coupled model. ORCHIDEE-MICT-BIOENERGY has been developed specifically  
19 to represent bioenergy crops (see Methods)<sup>5</sup>. The atmosphere model used here (LMDz)  
20 includes the fundamental dynamical and physical processes of the atmosphere<sup>3,4</sup>, and  
21 has a timestep of 2.15 min. The timestep of the land-surface model is 30 min. The spatial  
22 resolution of the coupled model is 1.26° latitude × 2.5° longitude.

### 23 **Supplementary Methods 2. Validation of the IPSL-CM model**

#### 24 *Supplementary Methods 2.1. Validation in previous studies*

25 The IPSL-CM we used is coupled by ORCHIDEE-MICT-BIOENERGY (the land

26 surface model) and LMDz (the atmosphere model). Parameters related to vegetation  
27 growth for the plant functional types (PFTs) of four bioenergy crop types in  
28 ORCHIDEE-MICT-BIOENERGY have been systematically calibrated in Li et al.<sup>5</sup>  
29 using plant measurements, and the yields were also evaluated against a global  
30 observation-based yield dataset for major lignocellulosic bioenergy crops<sup>6</sup>.  
31 Fundamental dynamical and physical processes of the atmosphere simulated by LMDz  
32 have been validated by Li et al.<sup>7</sup> and Zeng et al.<sup>8</sup> against stable-isotope-based  
33 transpiration observations<sup>8</sup>, satellite-based surface radiation data and surface energy  
34 fluxes from reanalysis data<sup>7</sup>. For the vegetation types other than bioenergy crops, the  
35 coupled IPSL-CM can reproduce the sensitivity of evapotranspiration to LAI changes<sup>8</sup>  
36 and reasonably simulate the temporal variations of surface energy fluxes<sup>7</sup>.

37 In the bioenergy crop simulations in our study, we covered 3.8%±0.5% of the global  
38 total land area with bioenergy crops. In the reference simulation for the composite  
39 cultivation map, food crop was cultivated in the BECCS regions. Therefore, we further  
40 evaluated the performance of the coupled model against the observed albedo and  
41 evapotranspiration for food crops and bioenergy crops in this study.

#### 42 ***Supplementary Methods 2.2. Validation for food crops using FLUXNET data***

43 Observations made over food crops at 19 sites were retrieved from the FLUXNET  
44 database<sup>9</sup> (Supplementary Table 1) and compared with the simulated results in the  
45 corresponding grid cell with the same vegetation type. The monthly simulated albedo  
46 and evapotranspiration agree with the observed data for food crops (Supplementary  
47 Figure 1-4). The simulated albedo of food crops also captures the observed seasonal  
48 variations with significant temporal correlations ( $p < 0.05$ ) in 10 out of 12 sites  
49 (Supplementary Figure 1). In fact, 65% of the monthly albedo observations can be  
50 reproduced by the model (i.e., dots with error bars crossing the 1:1 line, Supplementary  
51 Figure 2). Similarly, the seasonal variation of observed evapotranspiration is captured  
52 by the model simulation (Supplementary Figure 3). Significant correlations between

53 simulated and observed evapotranspiration were found (see p values in Supplementary  
54 Figure 3 and 68% dots with error bars crossing the 1:1 line in Supplementary Figure 4.

55 ***Supplementary Methods 2.3. Validation for bioenergy crops using collated***  
56 ***observations***

57 Field measurements of evapotranspiration and albedo for different bioenergy crops  
58 were collated and used to evaluate the model performance. We extracted 241  
59 observations of evapotranspiration from 77 articles and 49 observations of albedo from  
60 28 articles. Other information (e.g., crop type, measurement time) was also recorded.  
61 After aggregating the site observations into grid cells at the model resolution ( $1.26^\circ$   
62 latitude  $\times$   $2.5^\circ$  longitude), 109 observations of evapotranspiration and 36 observations  
63 of albedo were derived (Supplementary Table 2 and Supplementary Figure 5). Note that  
64 there might be several observations for one grid cell referring to different time spans  
65 (e.g., one reported averaged albedo during Jan-Mar and the other for July-Sep). We  
66 treated each of these as one individual observation to compare with the model results  
67 during the corresponding time period.

68 Simulated evapotranspiration (Supplementary Figure 6) and albedo (Supplementary  
69 Figure 7) generally agree with the observations, with most of the model-observation  
70 results lying around the 1:1 line. For evapotranspiration, there are 90 out of 109 points  
71 (83%) with error bars (representing the range) crossing the 1:1 line (Supplementary  
72 Figure 6), indicating that the model can at least capture some of the observations. For  
73 the other 19 points with inconsistent simulated and observed results, we listed the  
74 possible reasons for each site in Supplementary Table 3. Some main reasons include 1)  
75 the local climate different from the mean value of the whole grid cell in the model, and  
76 2) irrigation at the observation site not represented in the model. There are also some  
77 sites in our dataset with consecutive monthly observations of evapotranspiration  
78 (Supplementary Figure 8), and the model can generally reproduce the seasonal  
79 variations of observed evapotranspiration. However, the Tarim site (purple lines in  
80 Supplementary Figure 8), located in the desert, is an exception. The climate at Tarim is

81 warm and dry, and site-level observations of the vegetation state may be  
82 unrepresentative of the  $1.26^\circ$  (latitude)  $\times$   $2.5^\circ$  (longitude) grid cell as a whole. On the  
83 other hand, the model simulation also simplified the strong heterogeneity in the grid  
84 cell, leading to a mismatch between the grid-level simulation and field observation at  
85 this particular site.

86 Similarly, simulated albedo is consistent with observations (Supplementary Figure 7),  
87 with 28 out of the 36 observations with error bars (the full range) crossing the 1:1 line  
88 (Supplementary Figure 7). In addition, we compared satellite-based albedo  
89 observations with the model results. Cai et al.<sup>10</sup> reported MODIS-based albedo for  
90 miscanthus and switchgrass in six agro-ecological zones (AEZ7-AEZ12) in the US. We  
91 extracted the simulated albedo in the region studied by Cai et al.<sup>10</sup> and compared these  
92 values with the observations. The simulated albedo throughout the year generally  
93 agrees with the MODIS-based albedo values from Cai et al.<sup>10</sup> both for miscanthus and  
94 switchgrass (Supplementary Figure 9).

#### 95 ***Supplementary Methods 2.4. Comparison of the relative contribution of $\Delta T_a^{\text{cir}}$ to*** 96 ***$\Delta T_a$ with previous studies***

97 We also compared the relative contribution of  $\Delta T_a^{\text{cir}}$  to  $\Delta T_a$  deduced in our study with  
98 previous estimates<sup>8,11</sup>.  $\Delta T_a^{\text{cir}}$  is close to  $\Delta T_a$  from Luysaert et al.<sup>11</sup> for a future forest  
99 management scenario in European forest, because the components of  $\Delta T_a^{\text{local}}$  offset each  
100 other, resulting in a value of  $\Delta T_a^{\text{local}}$  of rather small magnitude (Figure 2b in Luysaert  
101 et al.<sup>11</sup>). Zeng et al.<sup>8</sup>, found that  $\Delta T_a^{\text{cir}}$  contributes over 40% to global  $\Delta T_a$  induced by  
102 increased LAI (comparing Figure 1a and Supplementary Figure 3b in Zeng et al.<sup>8</sup>). In  
103 our study,  $\Delta T_a^{\text{cir}}$  contributes 21%-79% to global  $\Delta T_a$  for the four bioenergy crop  
104 scenarios (Figure 2a).

#### 105 ***Supplementary Methods 2.5. Comparison of the biophysical effects with previous*** 106 ***study***

107 We also compare the biophysical effects on air temperature ( $\Delta T_a$ ) in our study against  
108 previous study over the central US<sup>12</sup>. Georgescu et al.<sup>12</sup> simulated the biophysical

109 effects of miscanthus (84 M ha) and maize in the central US by modifying the surface  
110 vegetation parameters of the Weather Research and Forecasting (WRF) model based on  
111 observations. They found that compared to maize, miscanthus cultivation has cooling  
112 effects ( $\Delta T_a = -0.45 \sim -0.84$  °C in the perturbed pixels, and  $= -0.07 \sim -0.16$  °C in all  
113 land pixels of the contiguous US, northern Mexico and southern Canada), mainly  
114 because of the enhanced evapotranspiration and decreased net surface shortwave and  
115 longwave radiation. Compared to Georgescu et al.<sup>12</sup>, our results for miscanthus  
116 cultivation in the central US (41 M ha) also show reduced air temperature ( $\Delta T_a = -$   
117  $0.27$  °C in the cultivation regions, and  $= -0.12$  °C in the contiguous US), mainly  
118 contributed by higher aerodynamic resistance (which was omitted in Georgescu et al.<sup>12</sup>),  
119 enhanced evapotranspiration and increased albedo.

## 120 **Supplementary Methods 3. Bioenergy crop cultivation distribution**

### 121 *Supplementary Methods 3.1. Bioenergy crop cultivation maps*

122 Large-scale cultivation of lignocellulosic bioenergy crops would inevitably compete for  
123 land against the original land use types (e.g., agricultural land or forest). To minimize  
124 this land competition, bioenergy crops are recommended to be planted on “marginal  
125 land”<sup>13</sup>. Marginal land mainly refers to agricultural land abandoned due to degradation,  
126 low profitability or environmental and ecological conservation<sup>14,15</sup>. To generate the  
127 bioenergy crop cultivation map (i.e., the BECCS regions used in this study), we  
128 combined global marginal land datasets from Campbell et al.<sup>16</sup> and Cai et al.<sup>17</sup> and  
129 bioenergy cultivation maps from future BECCS scenarios of two IAMs (MAgPIE<sup>18</sup> and  
130 IMAGE<sup>19</sup>).

131 Marginal land, as assessed by Campbell et al.<sup>16</sup>, is based on historical land-use changes  
132 (History Database of the Global Environment, HYDE 3.0<sup>20</sup>) and land-cover maps  
133 derived from MODIS. There are two maps with different assumptions of land-use  
134 transitions: Scenario High and Scenario Low (Campbell-high and Campbell-low,  
135 hereafter). In Campbell-high, the largest cropland area in each grid cell since 1700 was

136 compared with the cropland area in 2000 and the difference was regarded as the  
137 abandoned cropland area in that grid cell. The abandoned pasture area was calculated  
138 in the same way. In Campbell-low, conversion from pasture to cropland and conversion  
139 from cropland to pasture were considered. Therefore, only the decrement of total area  
140 of both cropland and pasture land was recognized as marginal land. In both scenarios  
141 from Campbell et al.<sup>16</sup>, transition from agricultural land to urban or forest was excluded  
142 from the marginal land area.

143 Cai et al.<sup>17</sup> first estimated land productivity using land properties like soil productivity,  
144 land slope, soil temperature and humidity and then classified the marginal land based  
145 on the land productivity: low, marginal and regular productivity. There are four  
146 scenarios of marginal land from Cai et al.<sup>17</sup>. Scenario 1 (used in this study) considers  
147 only land with mixed crops and natural vegetation with marginal productivity. Scenario  
148 2 adds marginal cropland on top of scenario 1; scenario 3 further adds marginal  
149 grassland, savanna and shrubland on to scenario 2; scenario 4 removes the pasture land  
150 from scenario 3.

151 The BECCS scenarios from MAgPIE<sup>18</sup> and IMAGE<sup>19</sup> were developed based on  
152 Representative Concentration Pathway (RCP) 2.6 and Shared Socio-economic Pathway  
153 (SSP) 2, where BECCS serves as the only negative emission technology option. Both  
154 IAMs harmonized the historical patterns of cropland and pasture land according to the  
155 HYDE 3.1 dataset<sup>21</sup>. In MAgPIE, competition between bioenergy crop cultivation and  
156 cropland is allowed<sup>18</sup>, while bioenergy crop cultivation must evade the food-production  
157 lands in IMAGE<sup>19</sup>.

158 The global total area available for bioenergy crop cultivation is 459.5 and 365.6 M ha  
159 for Campbell-high and Campbell-low, 425.6, 948.5, 1776.3 and 1418.9 M ha, for  
160 scenarios 1 to 4, respectively, of Cai et al.<sup>17</sup>, 523.4 M ha in 2100 for IMAGE and 407.7  
161 M ha in 2100 for MAgPIE, calculated from the 0.5° resolution maps. The areas of land  
162 available for bioenergy crop cultivation in scenarios 2 to 4 of Cai et al.<sup>17</sup> (1381.2 M ha

163 on average) are significantly higher than for other datasets (436.4 M ha on average) and  
164 may be unrealistic compared to that in IAMs. Therefore, we only used cultivation maps  
165 datasets from Campbell-high, Campbell-low, Scenario 1 of Cai et al.<sup>17</sup> (Cai S1,  
166 hereafter), IMAGE and MAgPIE (Supplementary Figure 10) to generate an idealized  
167 composite map for bioenergy crop cultivation.

### 168 ***Supplementary Methods 3.2. Composite bioenergy crop cultivation map***

169 One reason for using a composite map is to test the different biophysical effects of the  
170 four bioenergy crop types, and one composite map containing the cultivation  
171 information from all five maps would help save the computational resources. As for the  
172 sensitivity of biophysical effects to various cultivation maps, we performed additional  
173 simulations using three individual cultivation maps and two representative bioenergy  
174 crops (Supplementary Methods 4). Another reason is that because some biophysical  
175 variables in the model are not PFT specific (i.e., one value over the whole grid cell), if  
176 we used fractional PFT coverage in the grid cells with bioenergy cultivation, the  
177 biophysical signals are thus a mixture of all PFTs in these grid cells. As a result, we  
178 cannot separate the impacts in the BECCS region and outside the BECCS region  
179 (Figure 2). The composite cultivation map for idealized simulations was generated by  
180 the following steps:

- 181 1) We converted these five maps (Supplementary Figure 10) to the resolution of the  
182 coupled model (1.26° latitude × 2.5° longitude). For each dataset, we calculated the  
183 land area available for bioenergy crop cultivation in each grid cell at the new  
184 resolution using the total land area in the grid cell multiplied by the land fraction  
185 for bioenergy crop cultivation.
- 186 2) We calculated the land area available for bioenergy crop cultivation averaged over  
187 the five datasets in each grid cell (1.26° latitude × 2.5° longitude).
- 188 3) We arranged all land grid cells globally in a descending order of the mean bioenergy  
189 crop cultivation area calculated in the last step.

190 4) We selected the grid cells with the highest land area available as the most likely grid  
191 cells for bioenergy cultivation and covered the whole grid cell with bioenergy crops  
192 until the total area of the selected grid cells reaching 465.6 M ha (the mean value of  
193 IMAGE and MAgPIE, which were developed based on RCP 2.6 and SSP2).

194 The selected grid cells in the composite cultivation map were thus used as bioenergy  
195 crop cultivation regions (i.e., BECCS regions in this study) to drive the coupled model  
196 (Figure 1a). For the idealized simulations, the corresponding bioenergy crops were  
197 cultivated in the BECCS regions according to the composite map. Because the original  
198 source vegetation in the BECCS regions was mainly short vegetation (Supplementary  
199 Figure 11), and we assumed that bioenergy crop should be conservatively cultivated  
200 only on lands with short vegetation to get rid of deforestation, the BECCS source  
201 regions were covered by the generic food crop PFT in the reference simulation ( $S_{ref}$ , see  
202 details in Supplementary Methods 4). The BECCS regions in the composite map are  
203 distributed from 38°S to 60°N (Figure 1a).

#### 204 **Supplementary Methods 4. Simulating biophysical effects of bioenergy crop** 205 **cultivation**

##### 206 *Supplementary Methods 4.1. Simulations based on the composite cultivation map*

207 Large-scale bioenergy crop cultivation changes air temperature mainly through: 1)  
208 altering the atmospheric CO<sub>2</sub> concentration (e.g., CO<sub>2</sub> removal by vegetation growth  
209 and CO<sub>2</sub> emission from land cover changes), which modifies the greenhouse effect; and  
210 2) altering global energy cycling (e.g., changed surface albedo and disturbed  
211 evapotranspiration), which changes temperature through biophysical processes. Our  
212 study focused on the latter, specifically the biophysical effect on temperature of  
213 bioenergy crop cultivation, and targeted it with the following scenarios based on the  
214 composite cultivation map:

215 1) A reference scenario ( $S_{ref}$ ), with BECCS regions in the composite cultivation map  
216 covered by generic food crop vegetation. This scenario was initially run for 50 years



217 with constant atmospheric CO<sub>2</sub> concentration, unchanged land cover (that of 2015)  
218 and with sea surface temperature and sea ice extent prescribed by climatology data.  
219 We used the generic grain crop vegetation as the reference scenario because it was  
220 proposed to deploy bioenergy crops on marginal land (mainly abandoned  
221 agricultural land with short vegetation, Supplementary Figure 11) to avoid  
222 deforestation and direct land competition with food crops.

223 2) Four idealized bioenergy crop scenarios, in which the BECCS regions in the  
224 composite cultivation map were covered by one of the four individual bioenergy  
225 crop types (i.e., S<sub>euc</sub>: eucalypt, S<sub>p&w</sub>: poplar & willow, S<sub>mis</sub>: miscanthus, S<sub>swi</sub>:  
226 switchgrass), were conducted to simulate the biophysical effects of large-scale  
227 bioenergy crop cultivation. All the other settings of these scenarios are the same as  
228 in S<sub>ref</sub>.

229 3) We analyzed the multi-year mean values of outputs from all scenarios in order to  
230 obtain relatively stable results globally. To avoid the perturbations caused by the  
231 regular harvest of woody bioenergy crop cultivation (i.e., every 5 years), we  
232 averaged the outputs over the last 10 years of the simulations. The differences  
233 between the bioenergy crop scenarios and the reference scenario were assumed to  
234 be the changes induced by cultivation of each bioenergy crop.

235 The simulations were run for 50 years, which covers ten regular rotation cycles of  
236 woody bioenergy crops periods (harvested in every five years). In these simulations,  
237 the key vegetation features like leaf area index (LAI) and gross primary productivity  
238 (GPP) that are closely associated with the energy balances (e.g., evapotranspiration (ET)  
239 and albedo) generally reach a steady state after 5~10 years of the cultivation for all  
240 bioenergy crop types (Supplementary Figure 12). In addition, we averaged the results  
241 over the 41<sup>st</sup> – 50<sup>th</sup> year, the 36<sup>th</sup> – 50<sup>th</sup> year and the 31<sup>st</sup> – 50<sup>th</sup> year of the simulations  
242 to test the robustness against different timespans of aggregation (Supplementary Figure  
243 13). The results averaged over the 31<sup>st</sup> – 50<sup>th</sup> year or the 36<sup>th</sup> – 50<sup>th</sup> year of the

244 simulations generally agree with those over the last ten years (i.e., 41<sup>st</sup> – 50<sup>th</sup> year, used  
245 as the main results in this study). Therefore, the 50-year simulations are sufficient to  
246 derive a robust signal of the biophysical effects from bioenergy crop cultivation, and  
247 our main results using the data from the last ten years are also robust regardless of the  
248 choices in various analyzing periods.

#### 249 ***Supplementary Methods 4.2. Additional simulations for sensitivity tests***

250 In addition to the four idealized simulations based on the composite cultivation map  
251 ( $S_{euc}$ ,  $S_{p\&w}$ ,  $S_{mis}$  and  $S_{swi}$ ), we made another six simulations based on more realistic  
252 individual cultivation maps to test the sensitivity of biophysical effects to different maps  
253 (Supplementary Table 4). Because the coupled simulations are very computational-  
254 resource consuming, in the additional runs, we selected three representative maps out  
255 of the five maps (Supplementary Figure 10a-e): 1) global marginal land map from  
256 Campbell et al.<sup>16</sup> (Campbell-high) with abandoned agricultural lands as the cultivation  
257 area, which is widely distributing across the globe and covered by short vegetation, 2)  
258 the bioenergy crop cultivation map from IMAGE with cultivation area converted  
259 mainly from forest and very few from croplands, avoiding competing for lands with  
260 food crops, and 3) the bioenergy crop cultivation map from MAgPIE with the  
261 cultivation lands mainly converted from croplands because MAgPIE allows land  
262 competition between bioenergy crops and food crops based on cost minimization  
263 (Supplementary Table 4, Supplementary Figure 10). Cultivation maps from the two  
264 IAM scenarios considered BECCS as the only land-based negative emission option in  
265 limiting global warming in the future, and these models didn't limit bioenergy crop  
266 cultivation on marginal lands. These three selected maps are representative because  
267 they cover various total cultivation areas, different spatial distribution patterns and  
268 different land sources. Global total area for bioenergy crop cultivation in these three  
269 selected maps ranges from 408 to 523 M ha (88% to 112% of the BECCS area in the  
270 composite map, Supplementary Table 4, Supplementary Figure 10). Compared to the  
271 cultivation map from Campbell-high, bioenergy crop cultivation area from MAgPIE  
272 and IMAGE mainly concentrated in a few regions (e.g., Europe, central North America  
273 and central Africa). The bioenergy crop cultivation lands from IMAGE are mostly (78%)  
274 converted from forest, while cultivation lands from MAgPIE and Campbell-high are  
275 mainly from short vegetation (Supplementary Figure 10). For the bioenergy crop types,

276 we used eucalypt and switchgrass, representing one woody and one herbaceous crop,  
277 due to their contrasted biophysical effects in the simulations of the composite map  
278 (Figure 1 and 2). In total, six additional experimental simulations (3 individual  
279 cultivation maps  $\times$  2 bioenergy crop types) were run (i.e.,  $S_{euc}^{MAg}$ ,  $S_{euc}^{IMA}$ ,  $S_{euc}^{Cam}$ ,  $S_{swi}^{MAg}$ ,  $S_{swi}^{IMA}$   
280 and  $S_{swi}^{Cam}$  in Supplementary Table 4).

281 To match the six additional more realistic simulations, we also run a corresponding  
282 reference simulation ( $S_{ref}^{pre}$ ) with present-day land cover map in 2014<sup>22</sup>. Note that  $S_{ref}^{pre}$  of  
283 the six additional more realistic simulations is different from  $S_{ref}$  of the four idealized  
284 simulations ( $S_{euc}$ ,  $S_{p\&w}$ ,  $S_{mis}$ ,  $S_{swi}$ ) using the composite map. The idealized simulations  
285 are based on the composite map assuming that the whole grid cells in the cultivation  
286 regions were converted to bioenergy crops from marginal lands, originally with short  
287 vegetation. Therefore, generic food crops were cultivated in the BECCS regions to  
288 represent short vegetation in the  $S_{ref}$ , not the present land covers as in  $S_{ref}^{pre}$ . However, in  
289 the three individual maps, bioenergy crop cultivation area was fractional in each grid  
290 cell (not the whole grid cells as in the composite map) converted from different land  
291 sources. The present land cover map should thus be used in the corresponding reference  
292 simulation ( $S_{ref}^{pre}$ ). The biophysical effects based on the three individual cultivation maps  
293 (shown in Supplementary Table 4) are calculated by  $S_{ibio}^{imap} - S_{ref}^{pre}$ , where  $imap = IMAGE$ ,  
294  $MAgPIE$  or  $Campbell-high$ , and  $ibio = eucalypt$  or  $switchgrass$ . Except for the  
295 cultivation maps, other settings in the simulations in Supplementary Table 4 are the  
296 same as the idealized simulations based on the composite map ( $S_{euc}$ ,  $S_{p\&w}$ ,  $S_{mis}$ ,  $S_{swi}$ ).  
297 Differences in the changes of biophysical effects between simulations using the  
298 idealized composite map and more realistic individual maps thus result from differences  
299 in the total cultivation areas, spatial distribution patterns, land sources and bioenergy  
300 crop types.

### 301 *Supplementary Methods 4.3. Sensitivity of the IAV of $\Delta T_a$ on the simulation length*

302 The interannual variability (IAV) of global  $\Delta T_a$  is relatively large compared to the  
303 magnitude of global  $\Delta T_a$  averaged over the last 20 years. The global  $\Delta T_a$  from the

304 simulation based on the composite cultivation map is 0.03 – 0.08 °C for different  
305 bioenergy crop types, while the corresponding IAV is 0.16 – 0.19 °C. The high IAV of  
306 global  $\Delta T_a$  (0.16 – 0.19 °C) is mainly determined by  $\Delta T_a^{cir}$  (IAV = 0.17 – 0.20 °C),  
307 which varies remarkably across different years, while  $\Delta T_a^{local}$  generally shows a cooling  
308 effect with a lower IAV (0.02 – 0.04 °C), indicating the robust response of local  
309 temperature. In addition, to test the impact of simulation length on the IAV of global  
310 mean  $\Delta T_a$ , we extended the eucalypt cultivation scenario based on the IMAGE map (S  
311  $_{euc}^{MA}$ ) for another ten years (60 years in total) as an example. The IAV of  $\Delta T_a$  aggregated  
312 during the extended ten years (i.e., the 51<sup>st</sup> – 60<sup>th</sup> year) of the simulation didn't show  
313 significant differences from the IAV aggregated over other timespans of the simulation  
314 (i.e., the 31<sup>st</sup> – 40<sup>th</sup> year, the 41<sup>st</sup> – 50<sup>th</sup> year and the 31<sup>st</sup> – 60<sup>th</sup> year, Supplementary  
315 Figure 20). Therefore, the IAV of global mean  $\Delta T_a$  is mainly contributed by the IAV of  
316  $\Delta T_a^{cir}$ , and the simulation length seems to have little impact on the IAV.

### 317 **Supplementary Discussion 1. Mechanisms leading to larger temperature change** 318 **magnitudes in woody bioenergy crop scenarios**

319 In the bioenergy crop cultivation regions based on the composite cultivation map (i.e.,  
320 the BECCS regions), the magnitudes of energy flux changes in the woody bioenergy  
321 crop scenarios are greater than those in the herbaceous bioenergy crop scenarios (Figure  
322 2b). Compared to herbaceous crops, woody crops have higher LAI (Supplementary  
323 Figure 22 and 23) and deeper roots<sup>23</sup> and, as a consequence, stronger evapotranspiration  
324 (Figure 2b). The high LAI of woody bioenergy crops corresponds to a lower surface  
325 albedo in the BECCS regions (Figure 2b) and thus more radiation being absorbed by  
326 the land surface<sup>24</sup>. Planting woody bioenergy crops may increase aerodynamic  
327 resistance through reducing wind speed, but it can also decrease aerodynamic  
328 resistance through reducing atmosphere stability and enhancing surface roughness (i.e.,  
329 increasing effective surface roughness height) (Supplementary Figure 22 and 23). As a  
330 combination of these impacts, aerodynamic resistance over the BECCS regions is

331 generally reduced by woody bioenergy crop scenarios, leading to a cooling effect  
332 (Figure 2b). In addition, enhanced evapotranspiration from woody bioenergy crop  
333 cultivation increases air humidity and further increases cloud fraction (Supplementary  
334 Figure 22 and 23). This increased low-level cloud cover (Supplementary Figure 22 and  
335 23) reduces the amount of downward shortwave radiation reaching the land surface  
336 through decreased air transmissivity, leading to further surface cooling (Figure 2b)<sup>25-28</sup>.  
337 An increase in high-level cloud cover means more longwave radiation from the surface  
338 is absorbed and mostly emitted back to the surface<sup>29</sup>, leading to higher air emissivity  
339 for longwave radiation (warming effect, Figure 2b) in the BECCS regions<sup>25-27</sup>. These  
340 warming effects due to increased air emissivity and decreased albedo are counteracted  
341 by the cooling effects of enhanced evapotranspiration and reduced aerodynamic  
342 resistance, which decrease the local surface energy in the BECCS regions in the woody  
343 bioenergy crop scenarios (Figure 2b).

#### 344 **Supplementary Discussion 2. Difference between scenarios based on Campbell-** 345 **high cultivation map and those based on other maps**

346 The widespread BECCS cultivation in the Campbell-high map thus alters more grid  
347 cells across the globe. For example, there are 45,514  $1.26^\circ \times 2.5^\circ$  grid cells with  
348 bioenergy crop cultivation, which is 4.5 times of those in the IMAGE map (8,249 grid  
349 cells) and 5.5 times of those in the MAgPIE map (10,052 grid cells). Therefore, the  
350 eucalypt cultivation scenario based on the Campbell-high map brings stronger impact  
351 on both local energy budget and atmospheric circulation (i.e., larger magnitude of both  
352  $\Delta T_a^{\text{local}}$  and  $\Delta T_a^{\text{cir}}$ ) than those based on the other maps (Figure 4). For switchgrass  
353 cultivation, however, the temperature responses are generally gentle, with small  
354 differences of  $\Delta T_a$  among various cultivation maps (Figure 4), probably due to the lower  
355 biophysical changes when replacing current vegetation with switchgrass compared to  
356 eucalypt (Figure 2b). The differences between the scenario based on the Campbell-high  
357 map and the other maps emphasize the importance of the spatial cultivation patterns on

358 the biophysical effects.

### 359 **Supplementary Discussion 3. Differences between the two reference scenarios**

360 When comparing the changes of biophysical effects from the composite map with those  
361 from the three individual maps, the differences in the reference map also matters. The  
362 reference simulation ( $S_{ref}^{pre}$ ) for the six additional experimental simulations (3 individual  
363 cultivation maps  $\times$  2 bioenergy crop types) used the present-day map with observed  
364 fractional land covers in the bioenergy cultivation grid cells. By contrast, the  
365 simulations using the idealized composite map assumed that bioenergy crops were  
366 cultivated on the marginal lands with short vegetation, and the map in the corresponding  
367 reference simulation ( $S_{ref}$ ) covers the whole bioenergy cultivation grid cells with generic  
368 food crops. Therefore, differences induced by the two reference simulations also partly  
369 reflect the impacts of different land sources (present land covers vs. cropland) for the  
370 bioenergy crop cultivation. Compared to  $S_{ref}^{pre}$ ,  $S_{ref}$  generally shows higher  $T_a$  in the  
371 boreal regions and lower  $T_a$  in the pantropical regions (Supplementary Figure 33),  
372 partly contributing to the stronger cooling signals in the boreal regions and weaker  
373 cooling signals in the pantropical regions from idealized simulations using the idealized  
374 composite maps ( $S_{euc}$ ,  $S_{swi}$ ) than the six additional simulations using more realistic  
375 individual maps ( $S_{euc}^{MAg}$ ,  $S_{euc}^{IMA}$ ,  $S_{euc}^{Cam}$ ,  $S_{swi}^{MAg}$ ,  $S_{swi}^{IMA}$  and  $S_{swi}^{Cam}$ , Supplementary Figure 30).

376

377

378

379 **Supplementary Table 1.** Comparison between simulated albedo and  
 380 evapotranspiration (ET, mm day<sup>-1</sup>) and observations from the FLUXNET2015 database  
 381 for cropland.

| <i>Site ID</i> | <i>Longitude</i> | <i>Latitude</i> | <i>Observed<br/>albedo</i> | <i>Simulated<br/>albedo</i> | <i>Observed<br/>ET</i> | <i>Simulated<br/>ET</i> | <i>Begin<br/>year</i> | <i>End<br/>year</i> |
|----------------|------------------|-----------------|----------------------------|-----------------------------|------------------------|-------------------------|-----------------------|---------------------|
| <i>BE-Lon</i>  | 4.75             | 50.55           | 0.17                       | 0.14                        | 1.03                   | 1.46                    | 2004                  | 2014                |
| <i>CH-Oe2</i>  | 7.73             | 47.29           | /                          | /                           | 1.87                   | 1.36                    | 2004                  | 2014                |
| <i>DE-Geb</i>  | 10.91            | 51.10           | 0.20                       | 0.18                        | 0.97                   | 1.29                    | 2001                  | 2014                |
| <i>DE-Kli</i>  | 13.52            | 50.89           | 0.21                       | 0.22                        | 0.91                   | 1.37                    | 2004                  | 2014                |
| <i>DE-RuS</i>  | 6.45             | 50.87           | 0.14                       | 0.16                        | 1.75                   | 1.36                    | 2011                  | 2014                |
| <i>DE-Seh</i>  | 6.45             | 50.87           | /                          | /                           | 1.59                   | 1.36                    | 2007                  | 2010                |
| <i>DK-Fou</i>  | 9.59             | 56.48           | /                          | /                           | 0.26                   | 0.97                    | 2005                  | 2005                |
| <i>FI-Jok</i>  | 23.51            | 60.90           | 0.33                       | 0.33                        | 0.56                   | 1.07                    | 2000                  | 2003                |
| <i>FR-Gri</i>  | 1.95             | 48.84           | 0.17                       | 0.15                        | 1.36                   | 1.51                    | 2004                  | 2014                |
| <i>IT-CA2</i>  | 12.03            | 42.38           | 0.10                       | 0.13                        | 1.24                   | 1.70                    | 2011                  | 2014                |
| <i>US-ARM</i>  | -97.49           | 36.61           | 0.20                       | 0.19                        | 1.40                   | 2.08                    | 2003                  | 2012                |
| <i>US-CRT</i>  | -83.35           | 41.63           | 0.22                       | 0.22                        | 1.82                   | 1.83                    | 2011                  | 2013                |
| <i>US-Lin</i>  | -119.84          | 36.36           | /                          | /                           | 0.93                   | 1.24                    | 2009                  | 2010                |
| <i>US-Ne1</i>  | -96.48           | 41.17           | 0.21                       | 0.25                        | 1.88                   | 1.64                    | 2001                  | 2013                |
| <i>US-Ne2</i>  | -96.47           | 41.16           | 0.22                       | 0.25                        | 1.89                   | 1.64                    | 2001                  | 2013                |
| <i>US-Ne3</i>  | -96.44           | 41.18           | 0.23                       | 0.25                        | 1.72                   | 1.64                    | 2001                  | 2013                |
| <i>US-Tw2</i>  | -121.64          | 38.10           | /                          | /                           | 1.69                   | 1.58                    | 2012                  | 2013                |
| <i>US-Tw3</i>  | -121.65          | 38.12           | /                          | /                           | 2.84                   | 1.58                    | 2013                  | 2014                |
| <i>US-Twt</i>  | -121.65          | 38.11           | /                          | /                           | 2.89                   | 1.58                    | 2009                  | 2014                |

382

383

384 **Supplementary Table 2.** Albedo and evapotranspiration of different bioenergy crops  
 385 from field measurements.

386 [See the excel file.](#)

387

388 **Supplementary Table 3.** Comparison between the simulated evapotranspiration and  
 389 observed evapotranspiration and the possible reasons for the inconsistency of the 19  
 390 points shown as black circles in **Supplementary Figure 6.**

391 [See the excel file.](#)

392

393 **Supplementary Table 4.** Additional more realistic simulations based on three  
 394 individual cultivation maps and the representative bioenergy crop types.

| Simulation name | Cultivation data source | Global total cultivation area (M ha) | Land source for bioenergy crops globally                     | Bioenergy crop type |
|-----------------|-------------------------|--------------------------------------|--------------------------------------------------------------|---------------------|
| $S_{euc}^{Cam}$ | Campbell-high           | 460                                  | F=0%, C=26%, P=39%, G=35% *                                  | Eucalypt            |
| $S_{swi}^{Cam}$ | Campbell-high           | 460                                  | F=0%, C=26%, P=39%, G=35%                                    | Switchgrass         |
| $S_{euc}^{IMA}$ | IMAGE                   | 523                                  | F=78%, C=2%, P=9%, G=10%                                     | Eucalypt            |
| $S_{swi}^{IMA}$ | IMAGE                   | 523                                  | F=78%, C=2%, P=9%, G=10%                                     | Switchgrass         |
| $S_{euc}^{MAg}$ | MAgPIE                  | 408                                  | F=5%, C=75%, P=12%, G=8%                                     | Eucalypt            |
| $S_{swi}^{MAg}$ | MAgPIE                  | 408                                  | F=5%, C=75%, P=12%, G=8%                                     | Switchgrass         |
| $S_{ref}^{pre}$ | None                    | 0                                    | None, using the present vegetation distribution as reference | None                |

395 \* F, C, P and G represent forest, cropland, pasture and grassland, respectively. The data are the  
 396 area percentage of each land cover to the total area converted to bioenergy crop cultivation  
 397 lands.



398

399

400 **Supplementary Table 5.** Estimated biogeochemical cooling effect of CDR by BECCS

401 based on transient climate response to cumulative CO<sub>2</sub> emissions (TCRE).

| TCRE<br>(°C·EgC <sup>-1</sup> ) | TCRE references                                                                 | Estimated biogeochemical cooling effect<br>(°C) of CDR by BECCS from IAMs<br>(i.e., calculated as 128 PgC×TRCE) |
|---------------------------------|---------------------------------------------------------------------------------|-----------------------------------------------------------------------------------------------------------------|
| 0.8~2.5                         | <i>MacDougal et al.</i> <sup>29</sup> ;<br><i>Tokarska et al.</i> <sup>31</sup> | 0.10~0.32                                                                                                       |
| 0.8~2.4                         | <i>CMIP5, from Gillett et al.</i> <sup>32</sup>                                 | 0.10~0.31                                                                                                       |
| 0.7~2                           | <i>Gillett et al.</i> <sup>32</sup>                                             | 0.09~0.26                                                                                                       |
| 1~2.1                           | <i>Matthews et al.</i> <sup>33</sup>                                            | 0.13~0.27                                                                                                       |

402

403

404

405

406

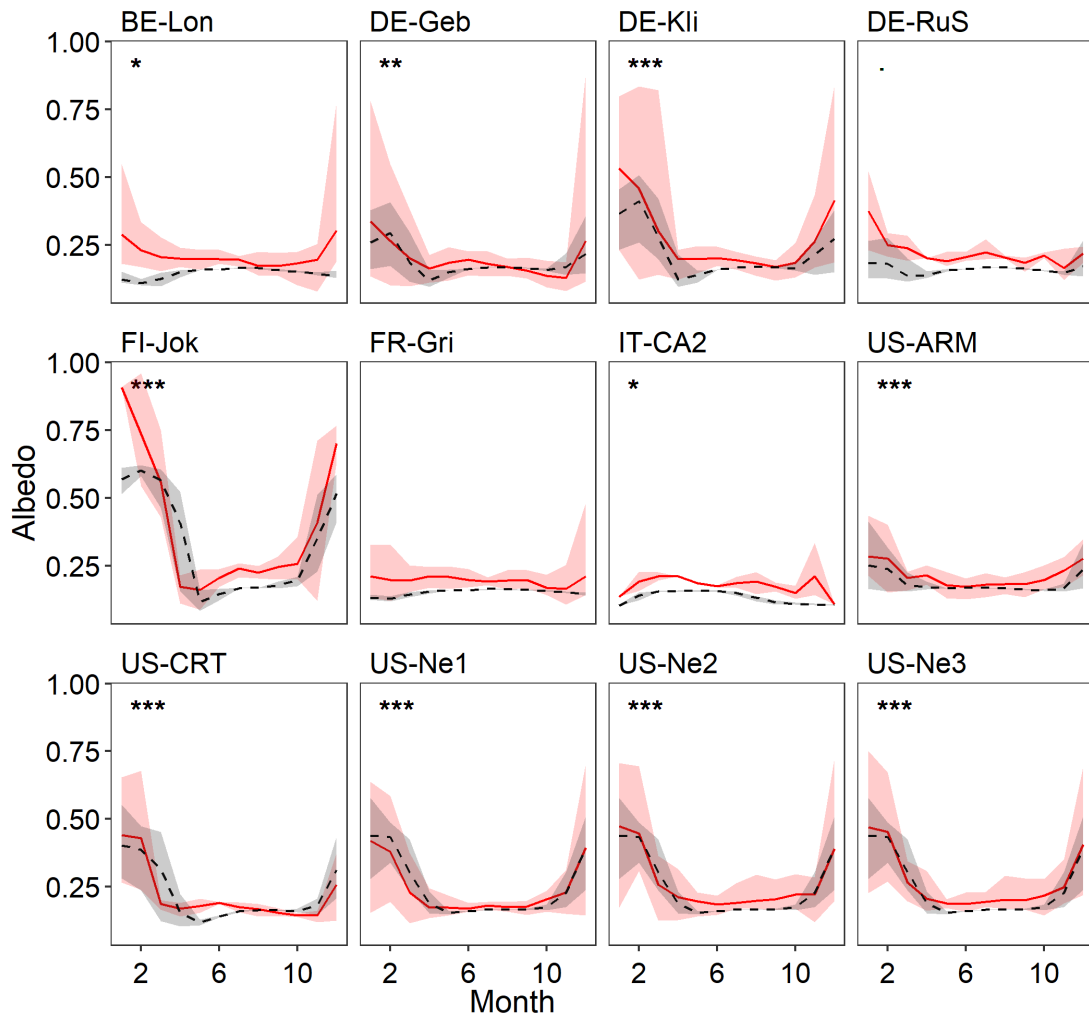

407

408 **Supplementary Figure 1.** Comparison between the variation of simulated albedo and  
 409 observed albedo from FLUXNET sites for cropland. Black dashed lines and red lines  
 410 represent simulated and observed albedo, respectively, with the shaded area  
 411 representing the inter-annual range. The asterisks in each panel (and in the following  
 412 figures) indicate the significance of the correlation coefficient between the simulated  
 413 results and observed values. “?”, “\*”, “\*\*”, “\*\*\*” indicate the p value <0.1, < 0.05,  
 414 <0.01, <0.005, respectively.

415

416

417

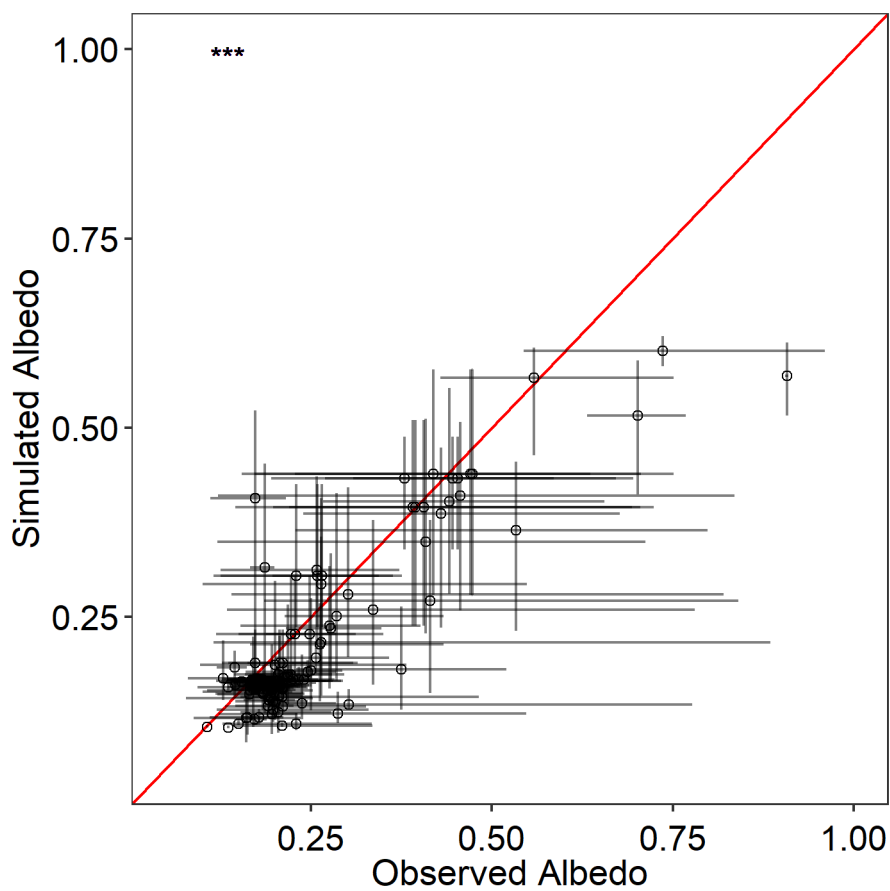

419

420 **Supplementary Figure 2.** Comparison between the monthly simulated albedo and  
421 observed albedo for the FLUXNET cropland sites. The error bars show the range of  
422 field observations and simulated results. The asterisks (\*\*\*) indicate the significance  
423 of the correlation coefficient between the simulated results and observed values (p value  
424 < 0.005).

425

426

427

428

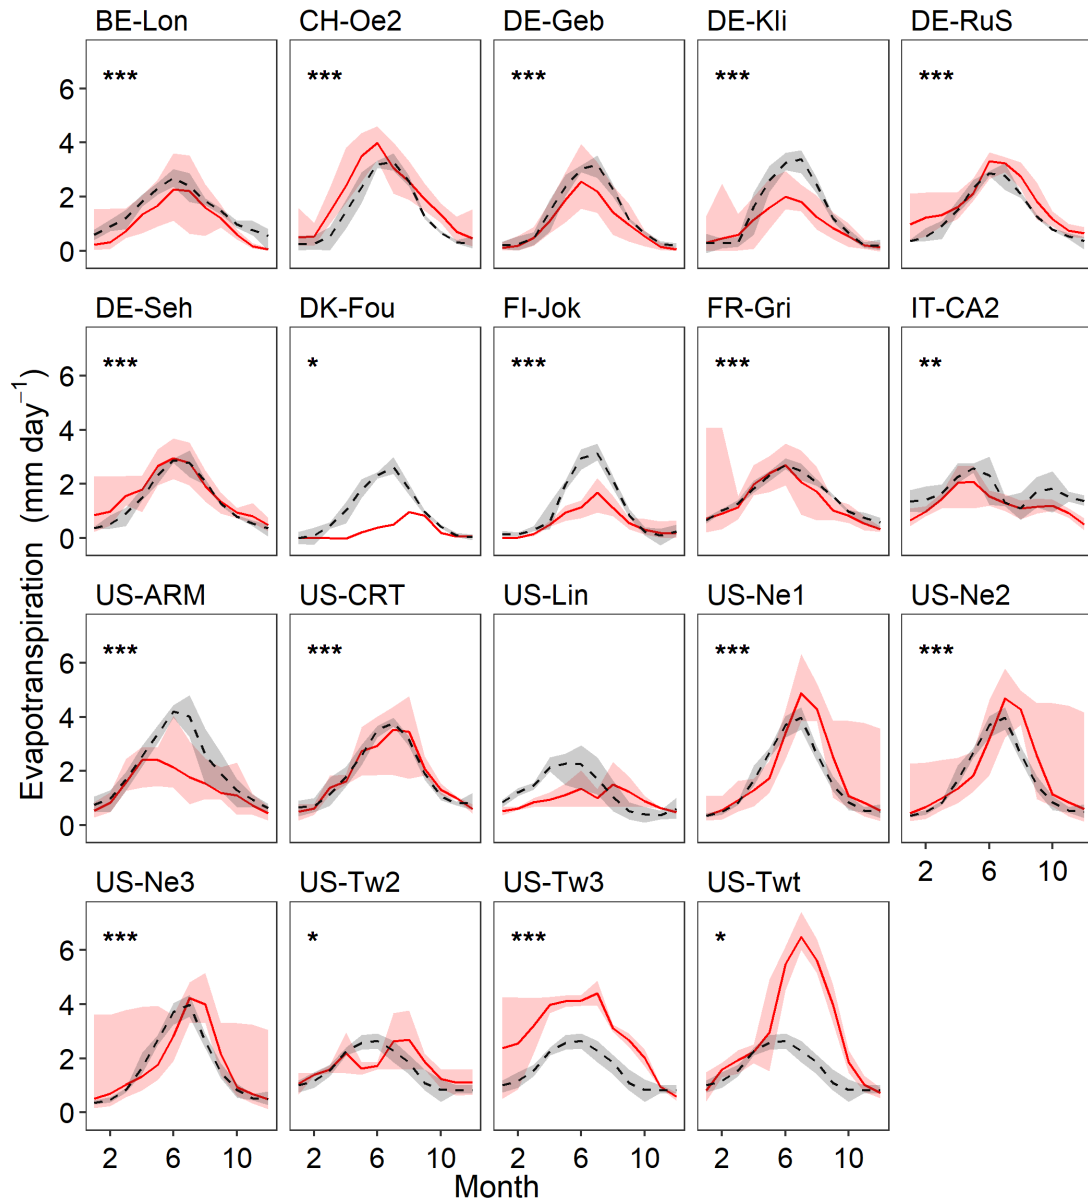

429

430 **Supplementary Figure 3.** Comparison between the variation of simulated  
 431 evapotranspiration and observed evapotranspiration at the FLUXNET cropland sites.  
 432 Black dashed lines and red lines represent simulated and observed evapotranspiration,  
 433 respectively. The shaded areas represent the inter-annual range. Other notation is as  
 434 described in **Supplementary Figure 1.**

435

436

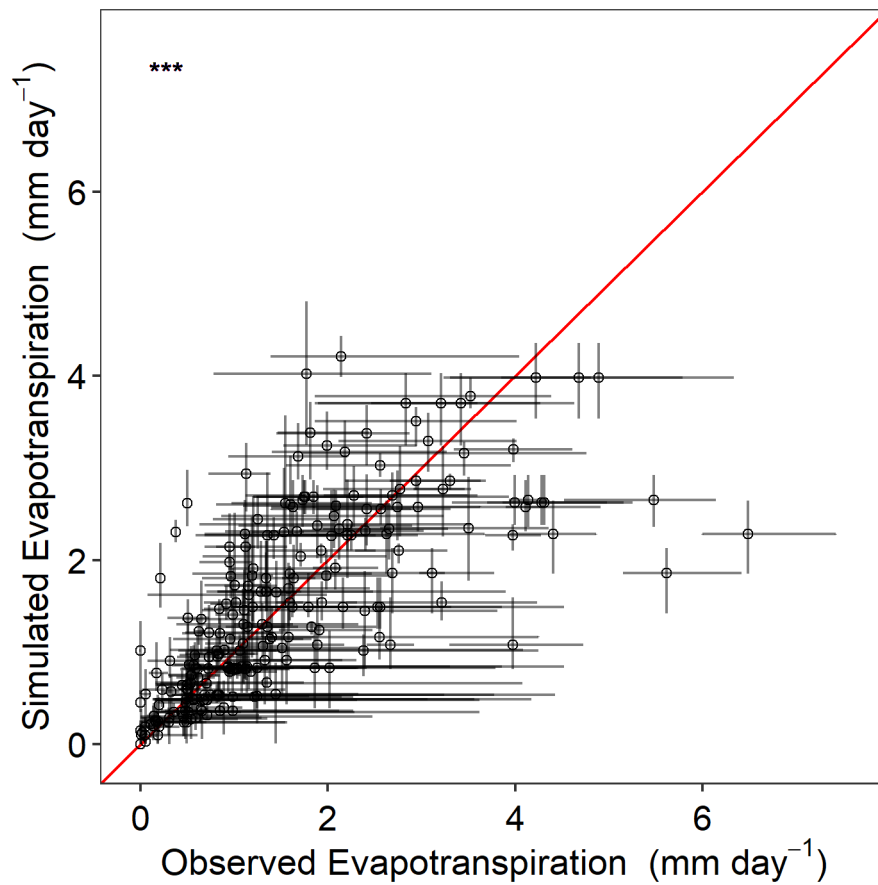

438

439 **Supplementary Figure 4.** Comparison between the monthly simulated  
440 evapotranspiration and observed evapotranspiration at the FLUXNET cropland sites.

441 Other notation is as described in **Supplementary Figure 2.**

442

443

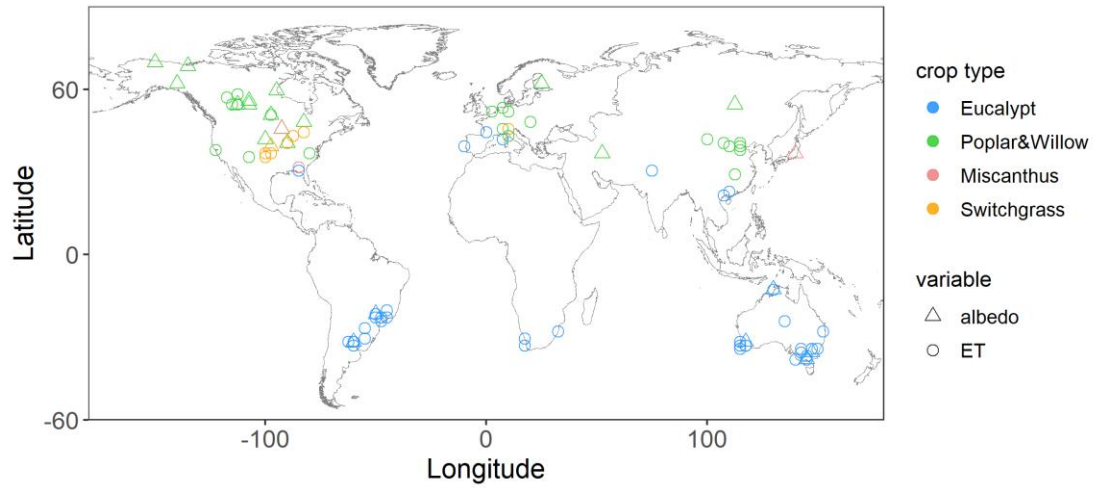

444

445 **Supplementary Figure 5.** Distribution of the collated observations of  
 446 evapotranspiration (ET) and albedo for bioenergy crops across the  $1.26^\circ$  (latitude)  $\times$   
 447  $2.5^\circ$  (longitude) grid cells.

448

449

450

451

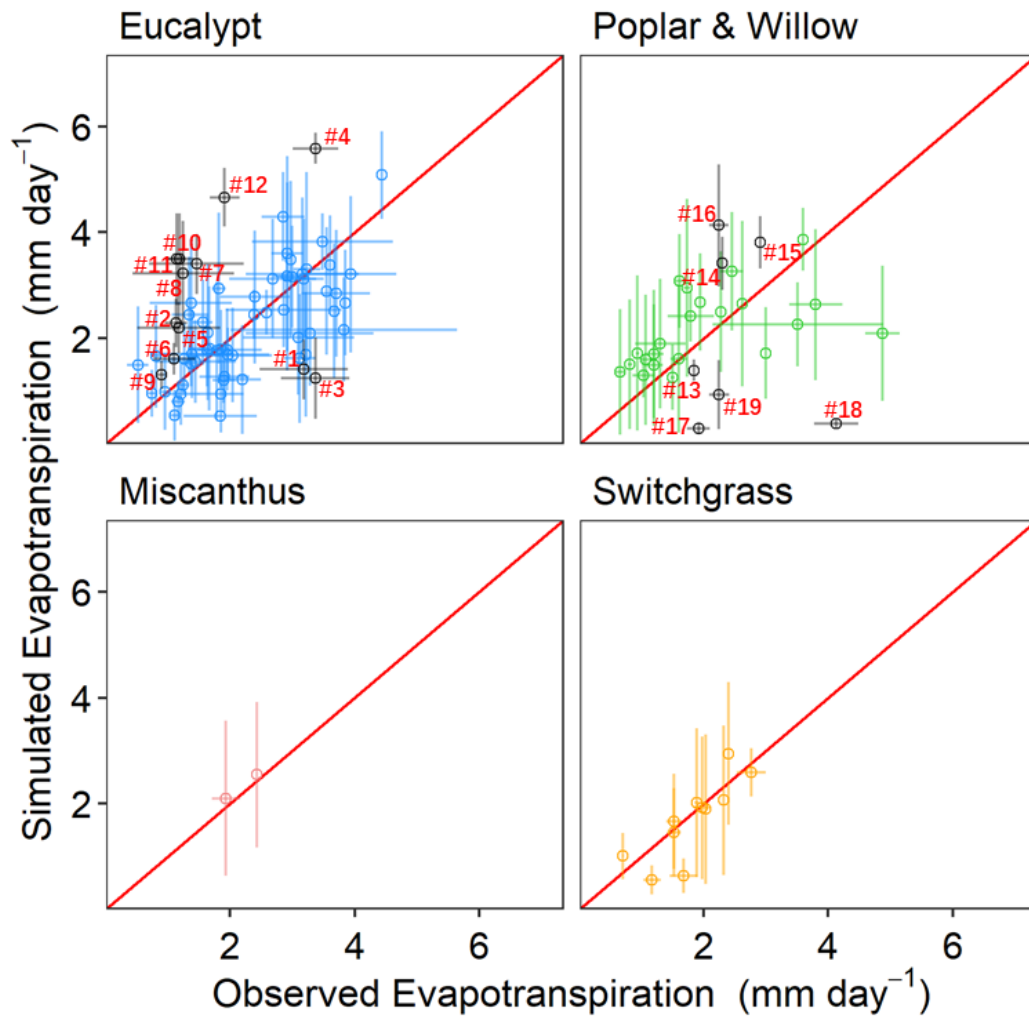

452

453 **Supplementary Figure 6.** Comparison between the simulated evapotranspiration and  
 454 observed evapotranspiration for four bioenergy crops. The error bars show the range of  
 455 field observations and model simulations. The points with mismatching results between  
 456 field observations and model simulations are labelled #1-#19 in reds (more details in  
 457 **Supplementary Table 3**), shown in black circles and grey error bars.

458

459

460

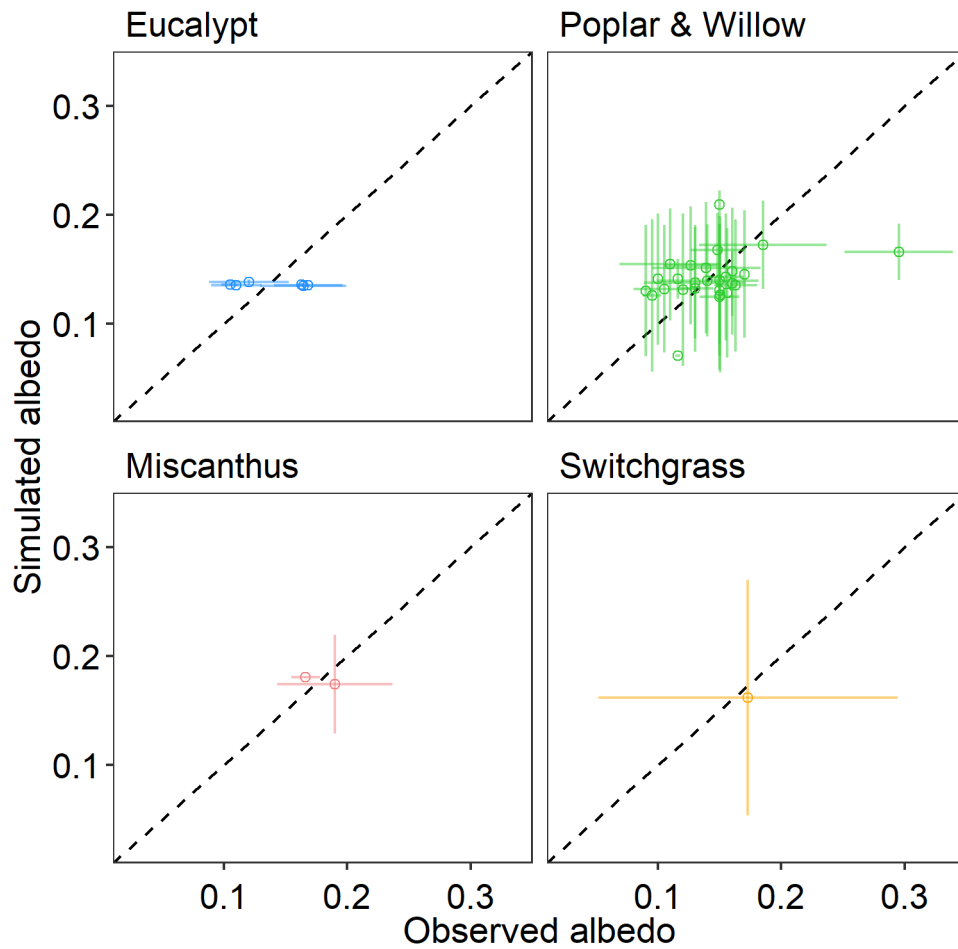

461

462 **Supplementary Figure 7.** Comparison between the simulated albedo and observed  
 463 albedo for four bioenergy crops. The error bars show the range of field observations  
 464 and model simulations.

465

466



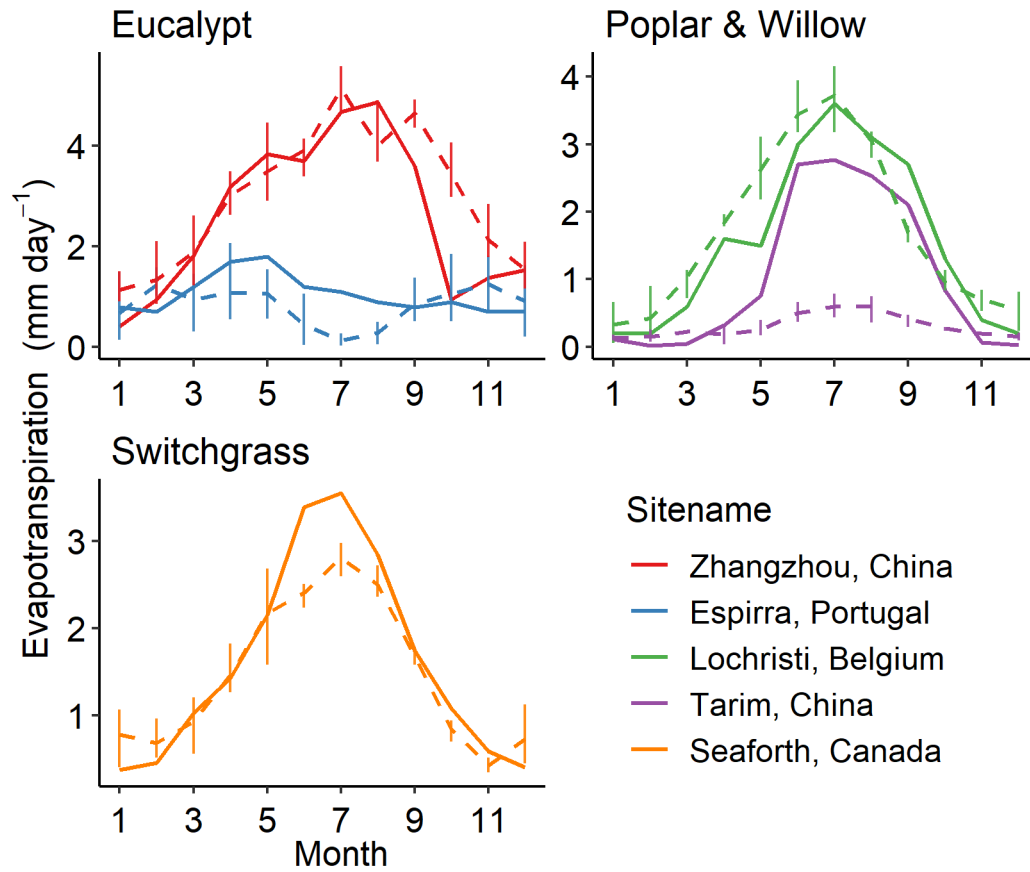

467

468 **Supplementary Figure 8.** Variation of observed evapotranspiration (solid lines) and  
 469 simulated evapotranspiration (dashed lines) at five sites for different bioenergy crops.

470

471

472

473

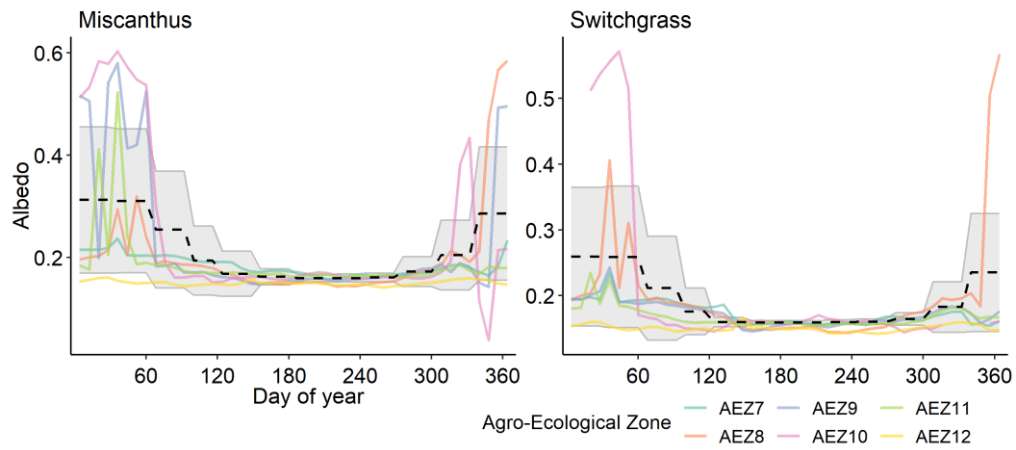

474

475 **Supplementary Figure 9.** Variation of MODIS albedo in six agro-ecological zones of  
 476 the US mainland from Cai et al.<sup>17</sup> (colored lines) and the simulated albedo (black dashed  
 477 line, with grey shading representing the spatial range) within the study region of Cai et  
 478 al.<sup>17</sup>.

479

480

481

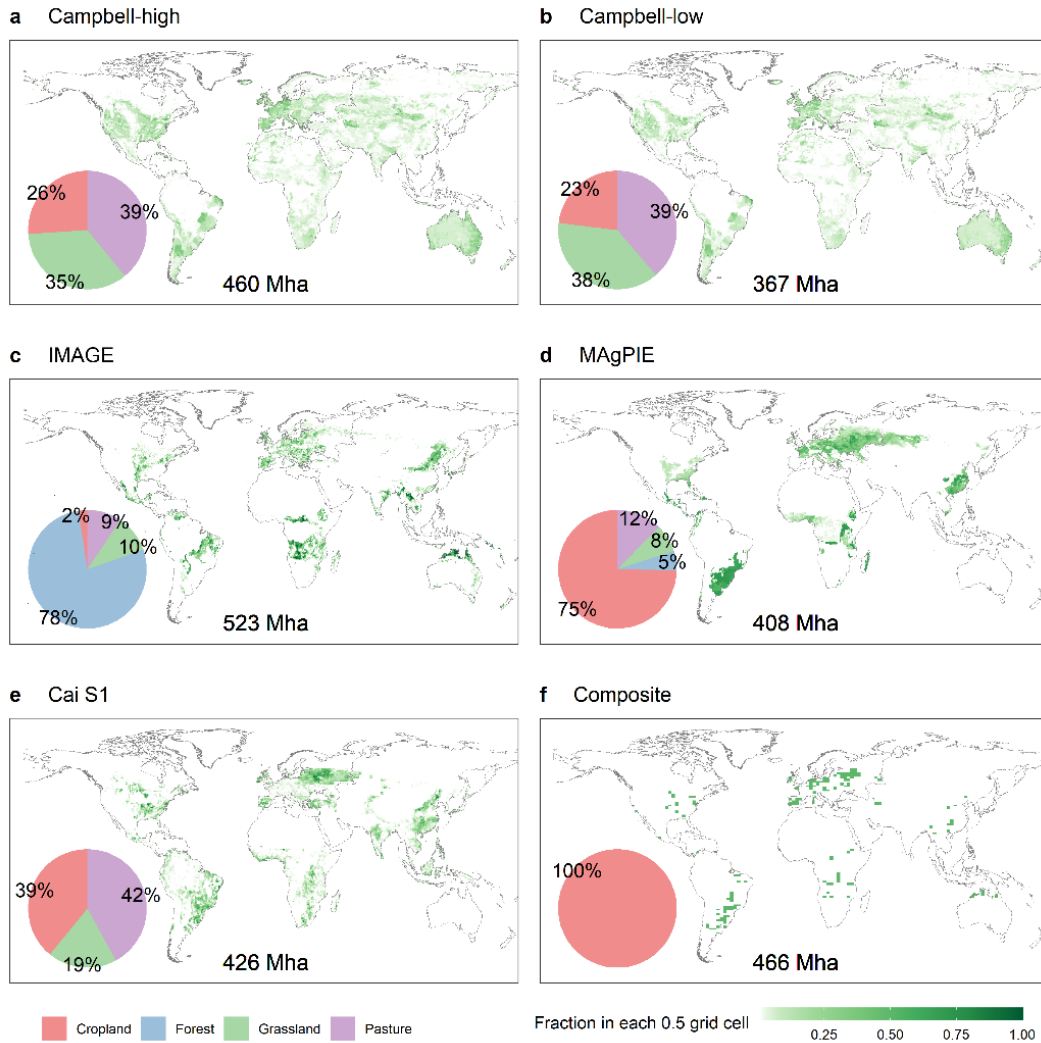

482

483 **Supplementary Figure 10.** Bioenergy crop cultivation lands from the five maps and  
 484 the composite map. The pie chart in each panel is the area percentage of source land  
 485 cover types converted to bioenergy crop cultivation lands. Global total cultivation area  
 486 for each map is also shown.

487

488

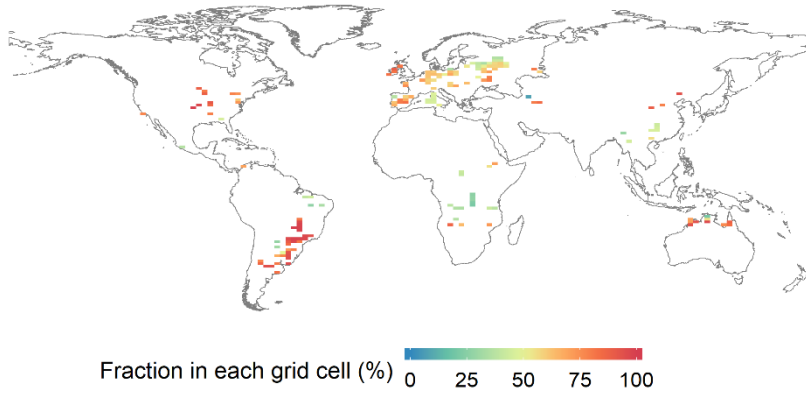

489

490 **Supplementary Figure 11.** The fraction of short vegetation (grassland and cropland)  
 491 originally in each grid cell of the BECCS regions from the composite map. For the  
 492 simulations, the vegetation type in these BECCS regions was changed into either the  
 493 generic crop type (i.e., in the reference scenario) or a specific bioenergy crop type (i.e.,  
 494 in the bioenergy crop scenarios).

495

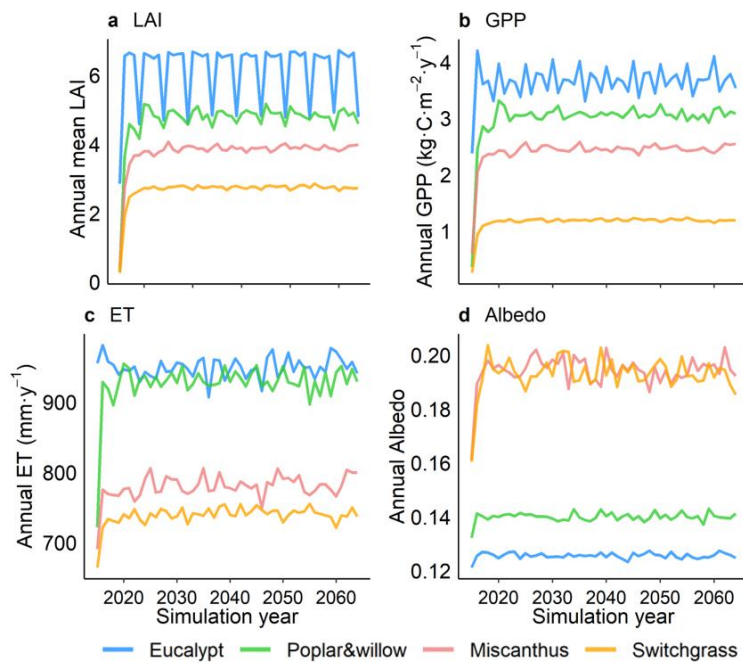

496

497 **Supplementary Figure 12.** Time series of LAI, GPP, ET, albedo during the 50-year  
 498 simulations for the four bioenergy crops based on the idealized composite cultivation  
 499 map.

500

501

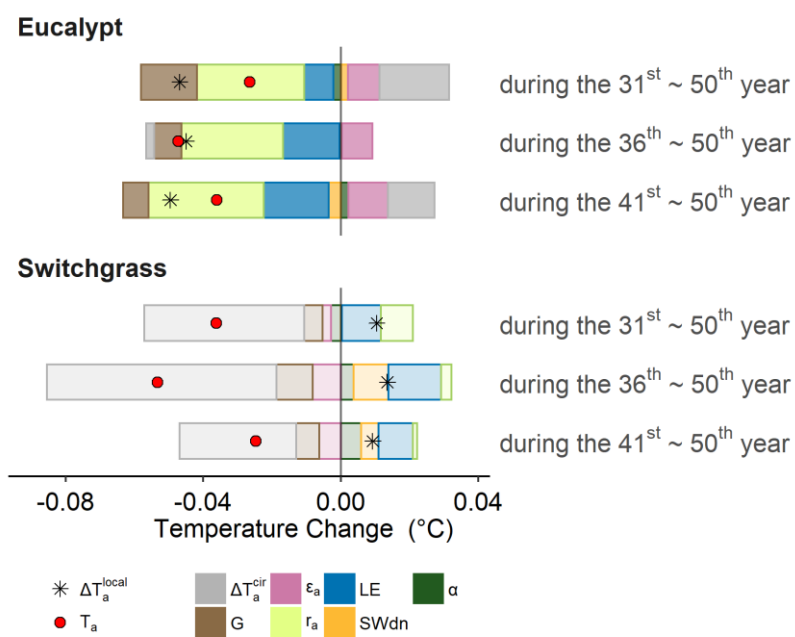

502

503 **Supplementary Figure 13.** Contributions of different components to air temperature  
 504 changes at the global scale for the eucalypt and switchgrass cultivation using the  
 505 composite cultivation map. Six rows of bars represent the results averaged over three  
 506 different periods (i.e., the 41<sup>st</sup> – 50<sup>th</sup> year, the 36<sup>th</sup> – 50<sup>th</sup> year and the 31<sup>st</sup> – 50<sup>th</sup> year)  
 507 of the simulations. Symbols are the same as in **Figure 2**.

508

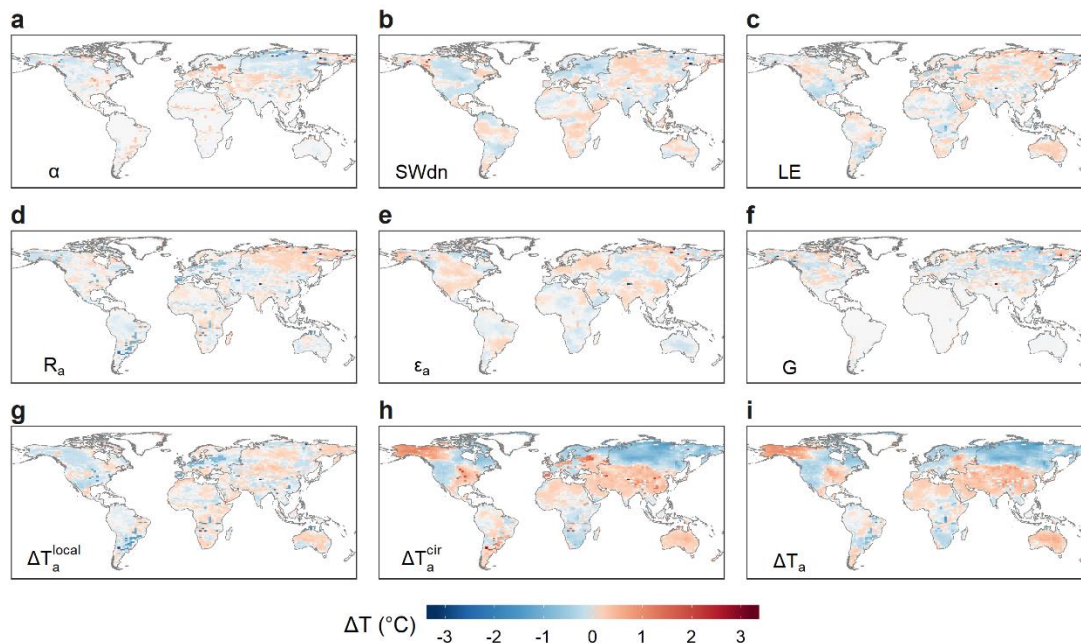

509

510 **Supplementary Figure 14.** Air temperature change in response to eucalypt cultivation  
 511 using the composite cultivation map. **a-f** show the contribution of each component to  
 512 air temperature change, with their combined effect shown in **g** (changes induced by  
 513 altered local surface energy balance). **h** shows the air temperature change induced by  
 514 atmospheric circulation. **i** shows the air temperature change (sum of **g** and **h**).

515

516

517

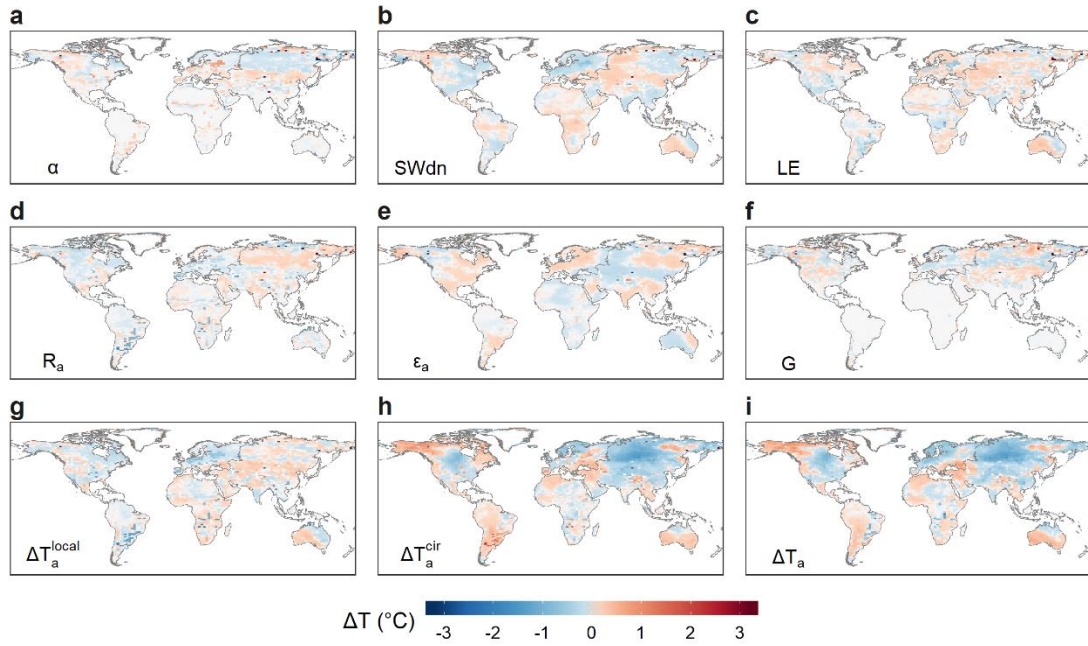

519 **Supplementary Figure 15.** Same as **Supplementary Figure 14** but for poplar &  
 520 willow.

521

522

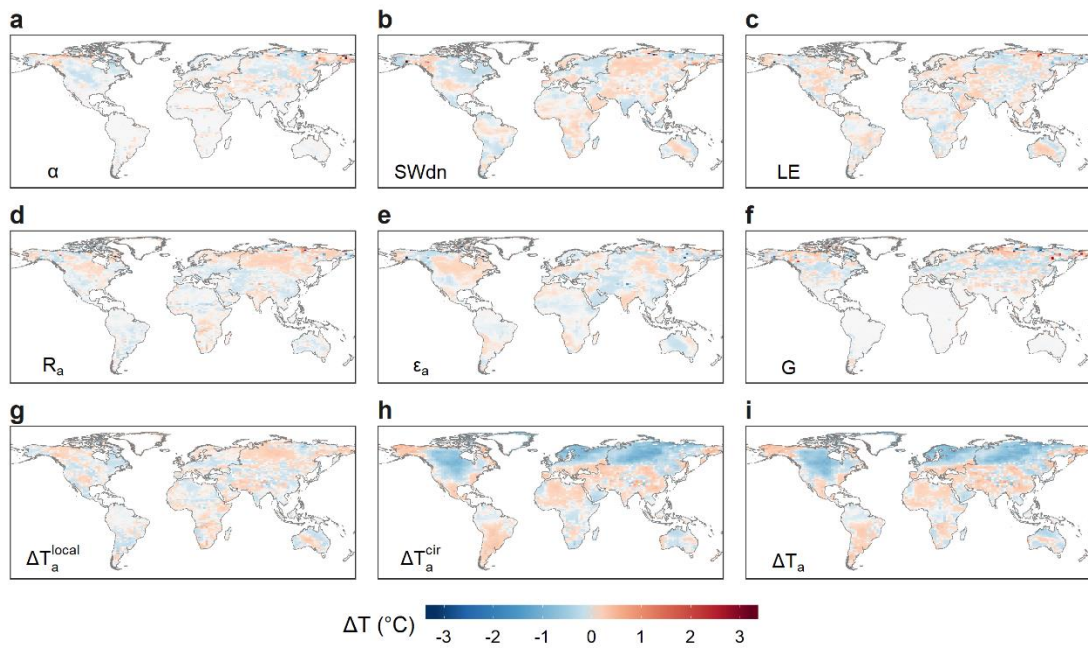

524 **Supplementary Figure 16.** Same as **Supplementary Figure 14** but for miscanthus.

525

526

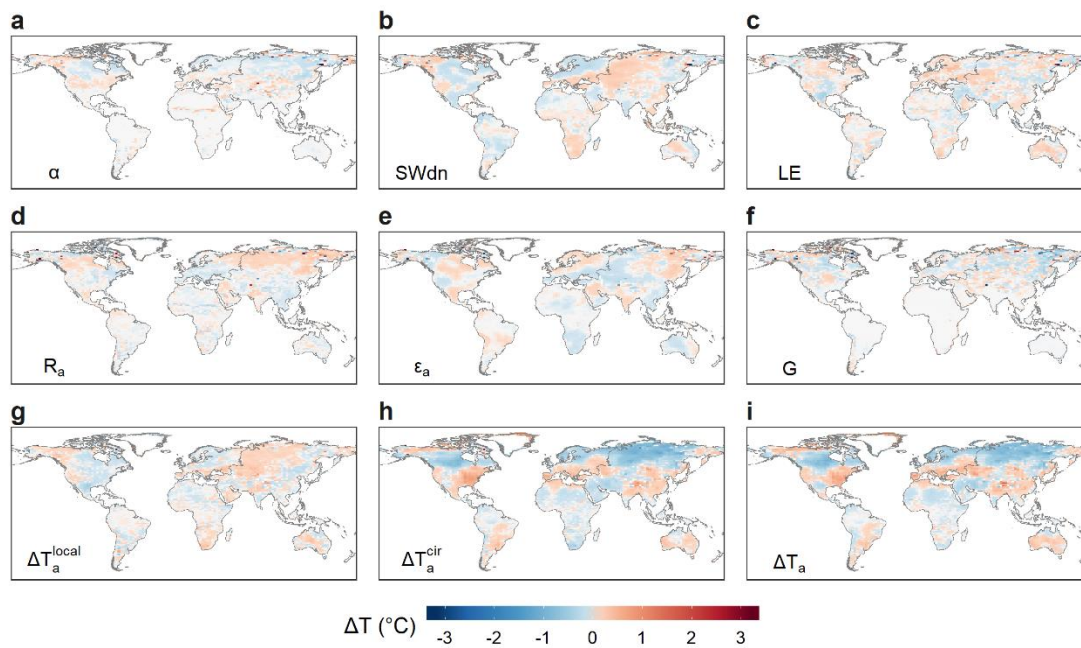

527

528 **Supplementary Figure 17.** Same as **Supplementary Figure 14** but for switchgrass.

529

530



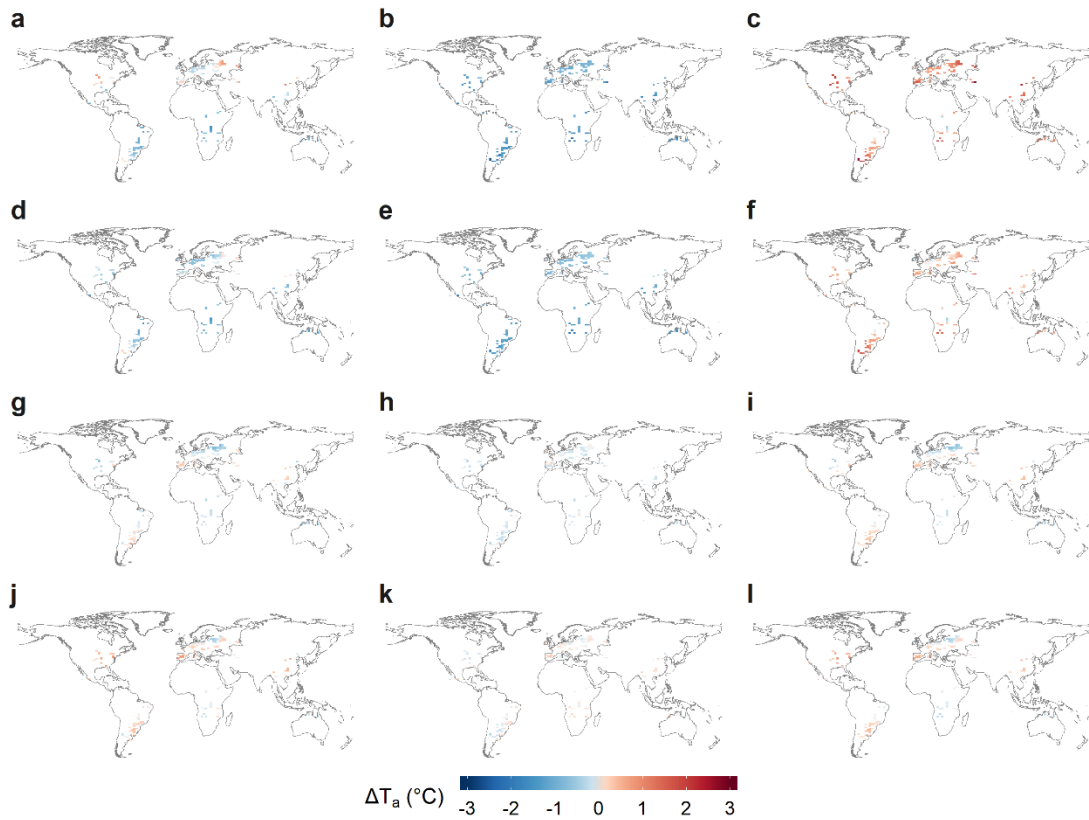

531

532 **Supplementary Figure 18.** Air temperature change in the BECCS regions based on  
 533 the composite cultivation map. Each row represents air temperature change due to  
 534 cultivation of a different bioenergy crop: eucalypt (**a-c**), poplar & willow (**d-f**),  
 535 miscanthus (**g-i**) and switchgrass (**j-l**). The left hand column of panels show air  
 536 temperature changes, while the middle and right hand columns show air temperature  
 537 changes induced by altered local surface energy balance ( $\Delta T_a^{\text{local}}$ ) and atmospheric  
 538 circulation changes ( $\Delta T_a^{\text{cir}}$ ), respectively.

539

540

541

542

543

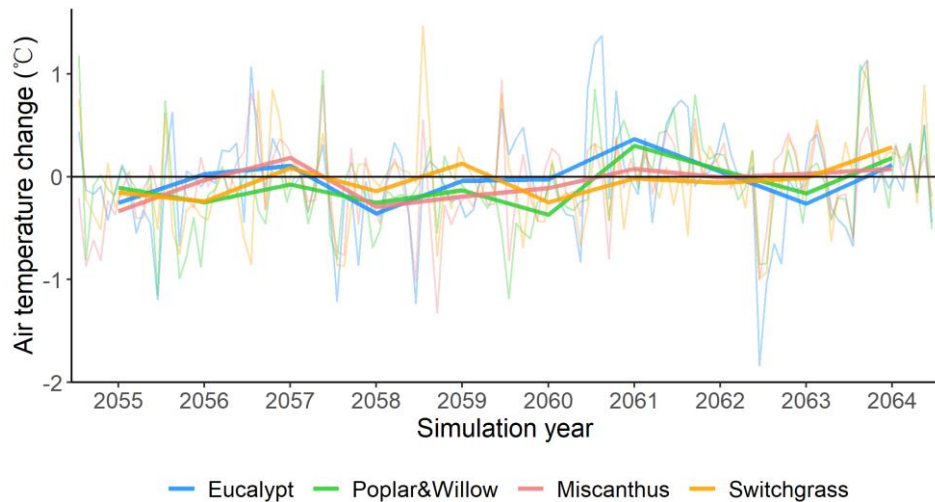

544

545 **Supplementary Figure 19.** Interannual variation of air temperature change in the four  
 546 idealized bioenergy crop scenarios using the composite cultivation map during the final  
 547 10 years of the simulations. The bold lines indicate annual  $\Delta T_a$  averaged over all grid  
 548 cells, while the fine lines represent monthly  $\Delta T_a$ .

549

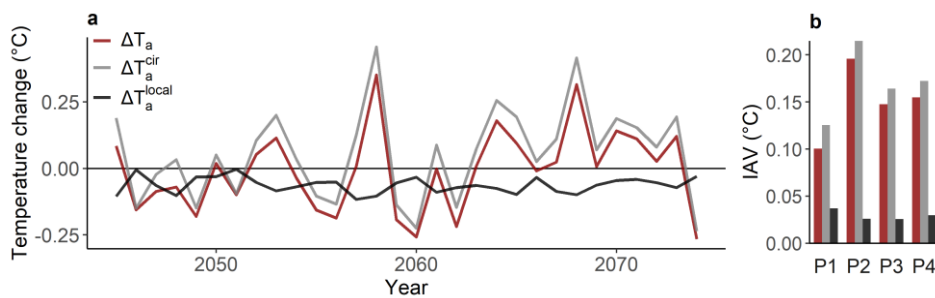

550

551 **Supplementary Figure 20.** Time series and interannual variability (IAV) of air  
 552 temperature change in the eucalypt cultivation scenario based on the IMAGE map. **a**  
 553 Time series of air temperature change ( $\Delta T_a$ ) and its two components induced by  
 554 changes in local energy budget ( $\Delta T_a^{local}$ ) and atmospheric circulation ( $\Delta T_a^{cir}$ ) during the  
 555 31<sup>st</sup> to 60<sup>th</sup> year of the simulation. **b** IAV of  $\Delta T_a$ ,  $\Delta T_a^{local}$  and  $\Delta T_a^{cir}$  (same color as in a)  
 556 over different periods of the simulation (“P1”, “P2”, “P3” and “P4” represent the  
 557 periods of 31<sup>st</sup> – 40<sup>th</sup> year, the 41<sup>st</sup> – 50<sup>th</sup> year, the 51<sup>st</sup> – 60<sup>th</sup> year and the 31<sup>st</sup> – 60<sup>th</sup>  
 558 year of the simulation).

559

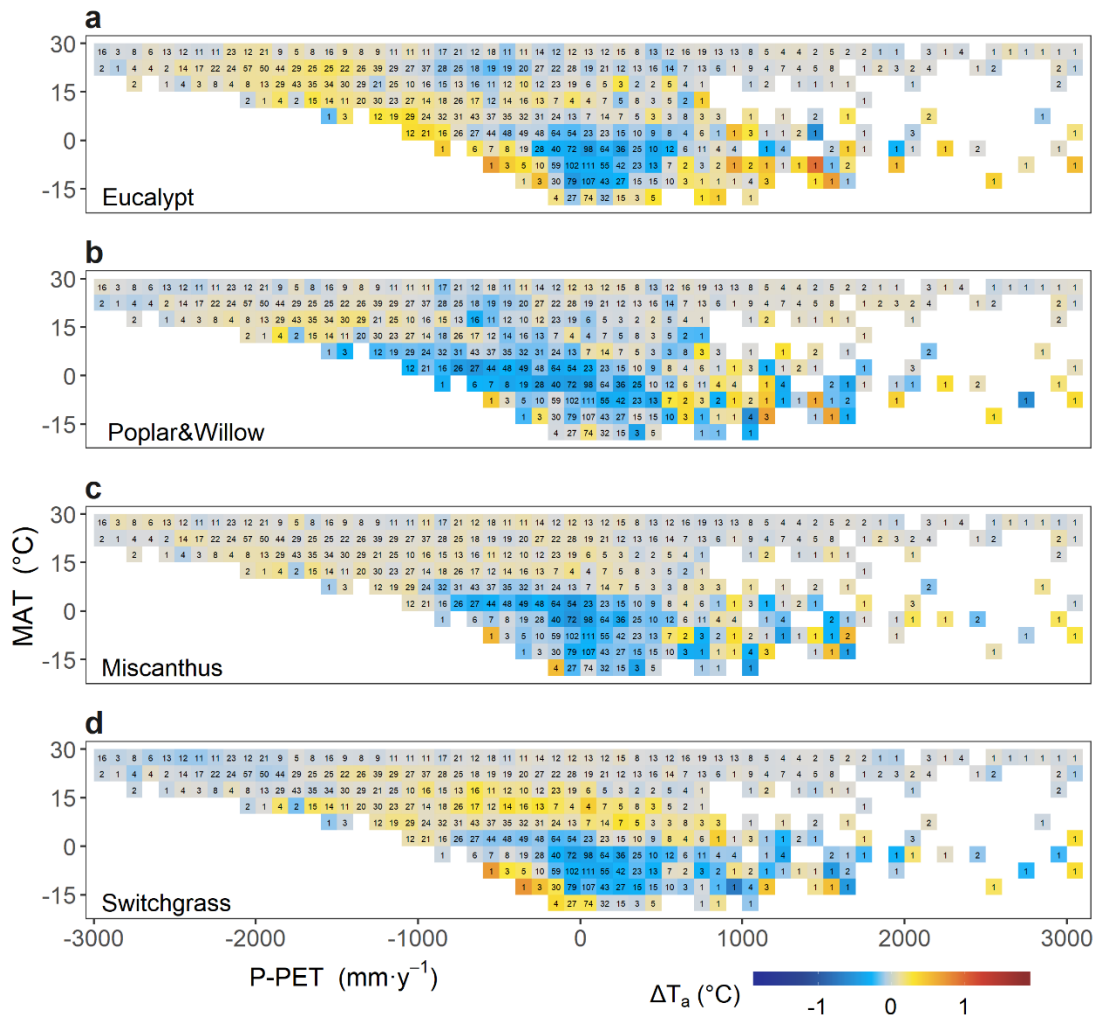

561

562 **Supplementary Figure 21.** Mean air temperature change in each MAT (mean annual  
 563 temperature) and P-PET (difference between mean annual precipitation and mean  
 564 annual potential evapotranspiration) interval. **a-d** represent  $T_a$  changes due to the  
 565 cultivation of eucalypt (**a**), poplar & willow (**b**), miscanthus (**c**) and switchgrass (**d**)  
 566 using the composite cultivation map.

567

568

569

570

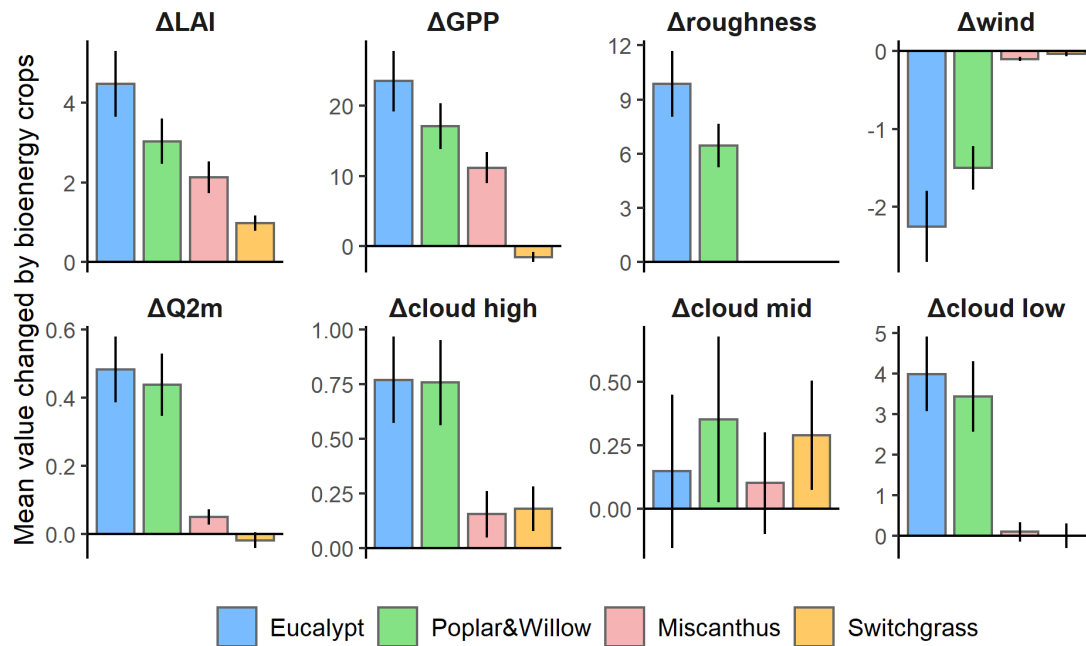

571

572 **Supplementary Figure 22.** Mean changes of various variables in response to  
 573 bioenergy crop cultivation in the BECCS regions based on the composite cultivation  
 574 map. The variables are LAI, GPP ( $\text{kg m}^{-2}$ ), surface roughness height (“roughness”, m),  
 575 surface wind speed at 10m height ( $\text{m s}^{-1}$ ), specific air humidity at 2m height (“Q2m”,  
 576  $\text{kg kg}^{-1}$ ), high cloud fraction (“cloud high”, %), medium cloud fraction (“cloud  
 577 mid”, %), and low cloud fraction (“cloud low”, %). Error bars show the standard error  
 578 of the changes.

579

580

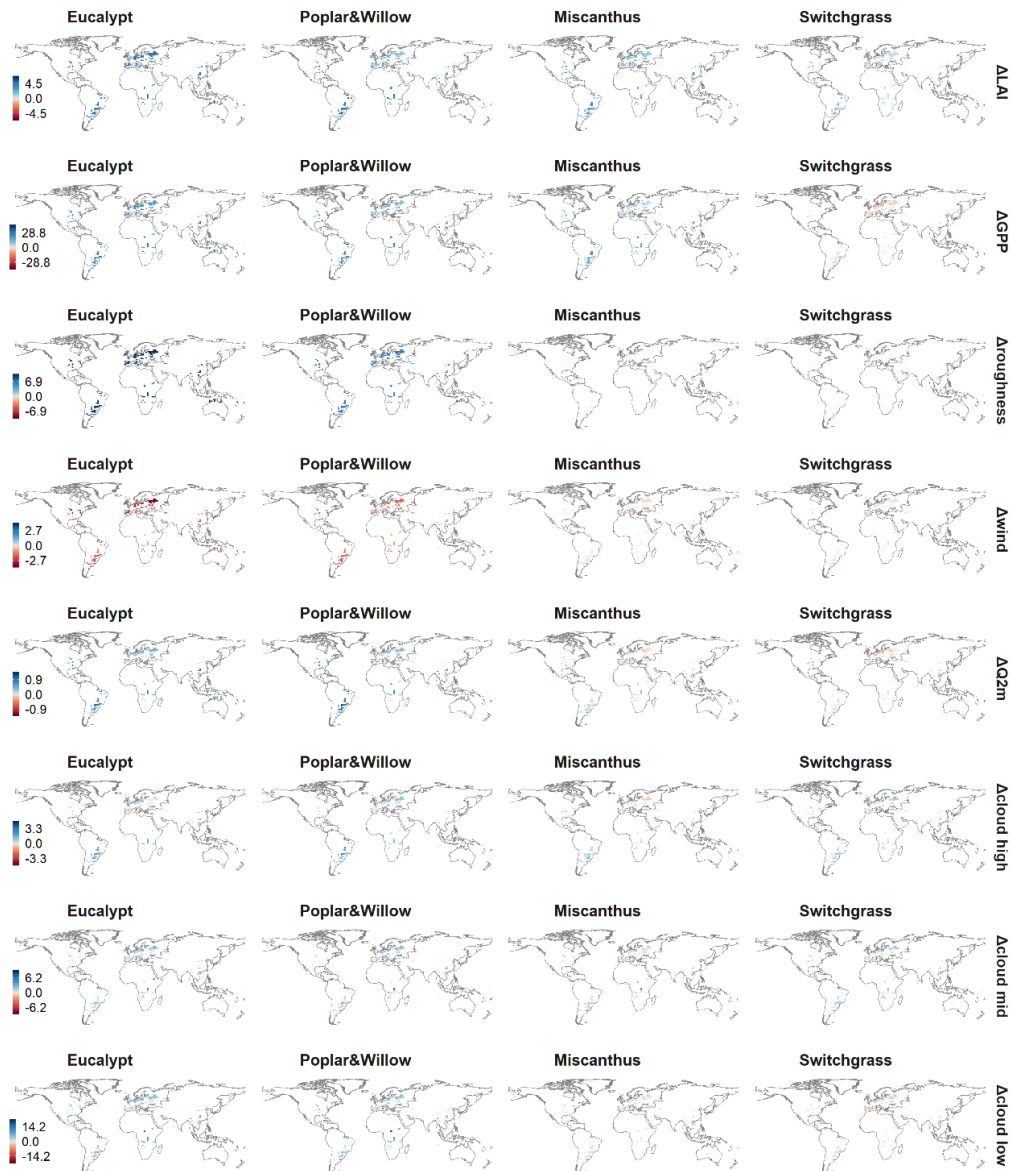

581

582 **Supplementary Figure 23.** Changes of relevant variables in response to bioenergy  
 583 crop cultivation over the BECCS regions based on the composite cultivation map. The  
 584 four columns represent variable changes due to cultivation of eucalypt, poplar & willow,  
 585 miscanthus and switchgrass, respectively. The variables are LAI, GPP ( $\text{kg m}^{-2}$ ), surface  
 586 roughness height (“roughness”, m), surface wind speed at 10m height ( $\text{m s}^{-1}$ ), specific  
 587 air humidity at 2m height (“Q2m”,  $\text{kg kg}^{-1}$ ), high cloud fraction (“cloud high”, %),  
 588 medium cloud fraction (“cloud mid”, %), and low cloud fraction (“cloud low”, %).

589

590

591

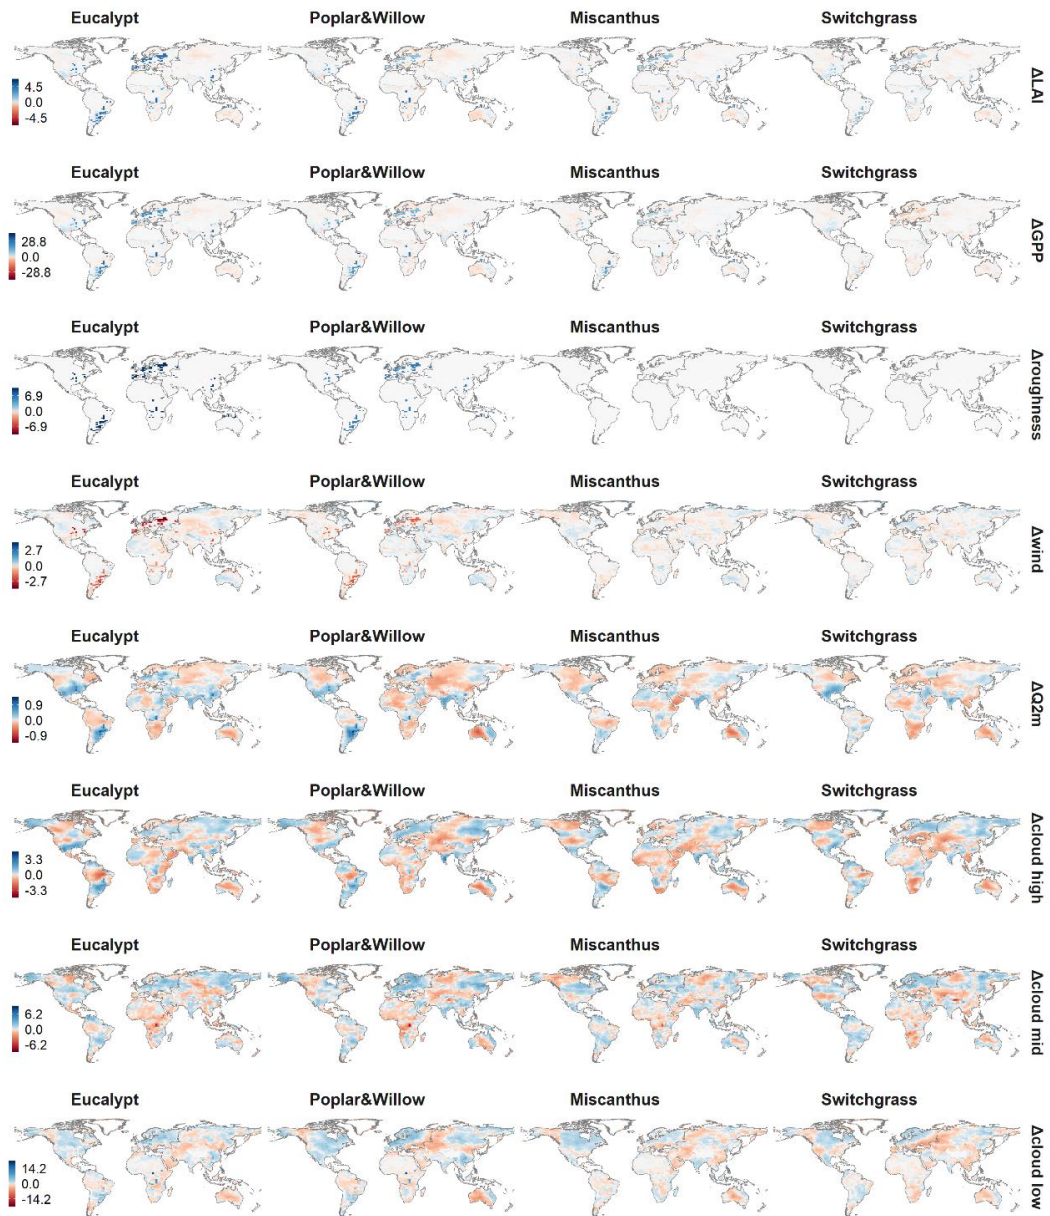

592

593 **Supplementary Figure 24.** Same as **Supplementary Figure 23** but for the entire  
594 global land surface.

595

596

597

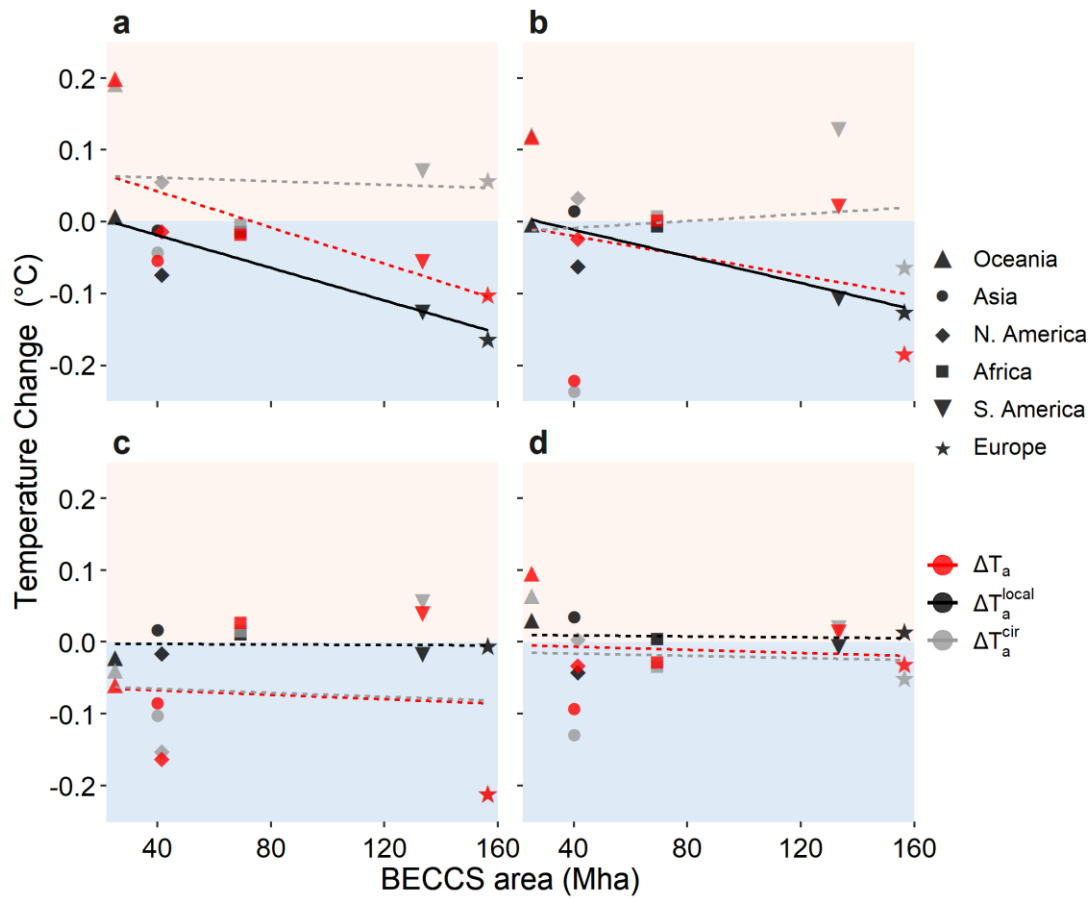

598

599 **Supplementary Figure 25.** BECCS area and temperature change based on the  
600 composite cultivation map (mean  $\Delta T_a$ ,  $\Delta T_a^{local}$  and  $\Delta T_a^{cir}$  over the whole continent) in  
601 different continents. **a-d** show temperature changes induced by cultivation of eucalypt  
602 (a), poplar & willow (b), miscanthus (c) and switchgrass (d). Background shading  
603 indicates the sign of the temperature change (red for a warming effect and blue for a  
604 cooling effect). The solid and dotted lines indicate significant correlations with  $p < 0.05$   
605 and  $p > 0.05$  respectively.

606

607

608

609

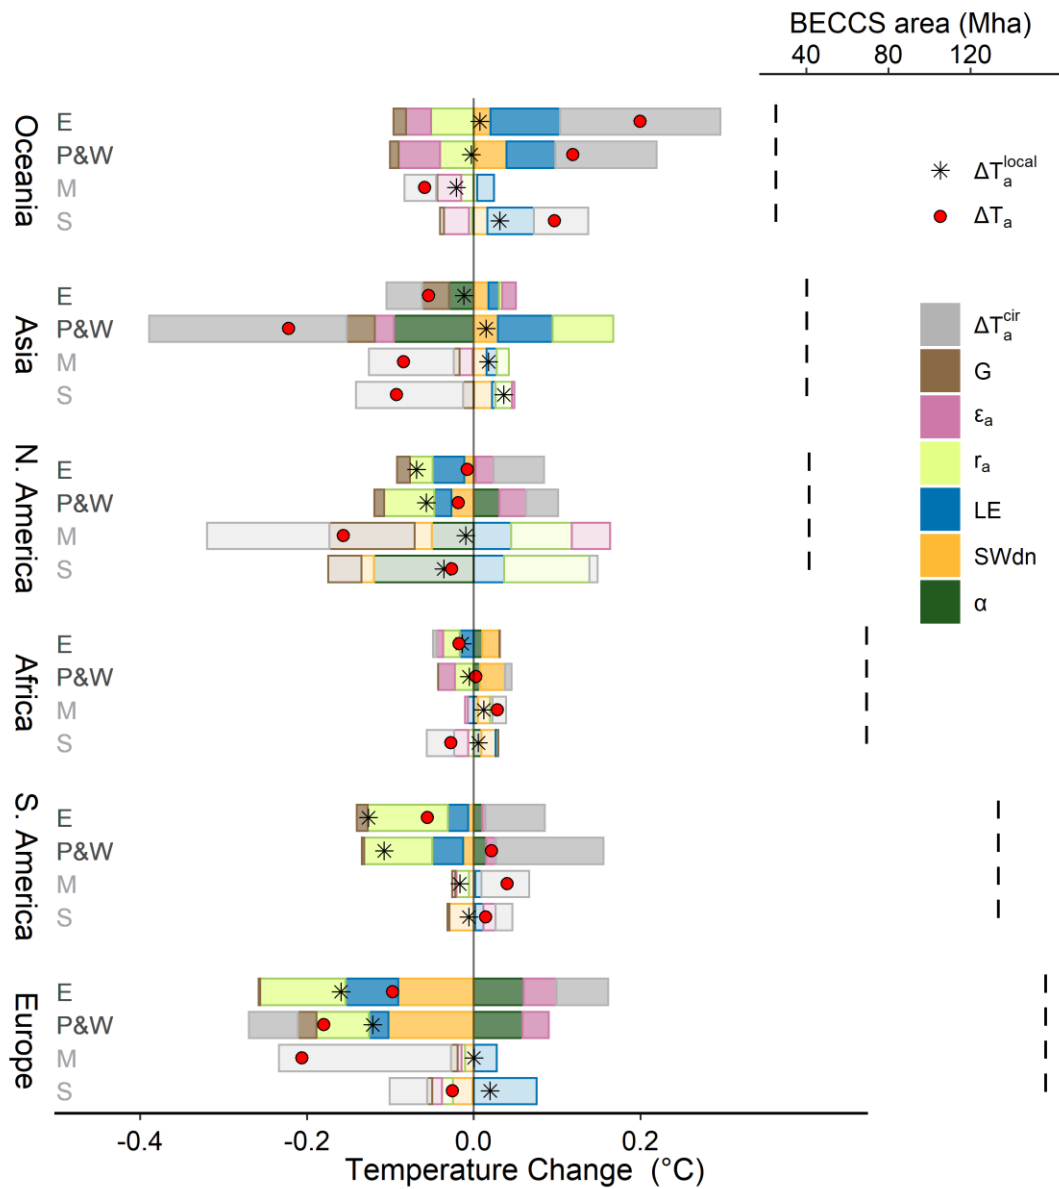

610

611 **Supplementary Figure 26.** Contributions of different components to air temperature  
 612 changes in each continent for the four bioenergy crops (E: eucalypt; P&W: polar &  
 613 willow; M: miscanthus; S: switchgrass) based on the composite cultivation map. Area  
 614 of bioenergy cultivation (i.e., BECCS area) in each continent is shown on the right.  
 615 Symbols in the bar plot are the same as in **Figure 2**.

616

617



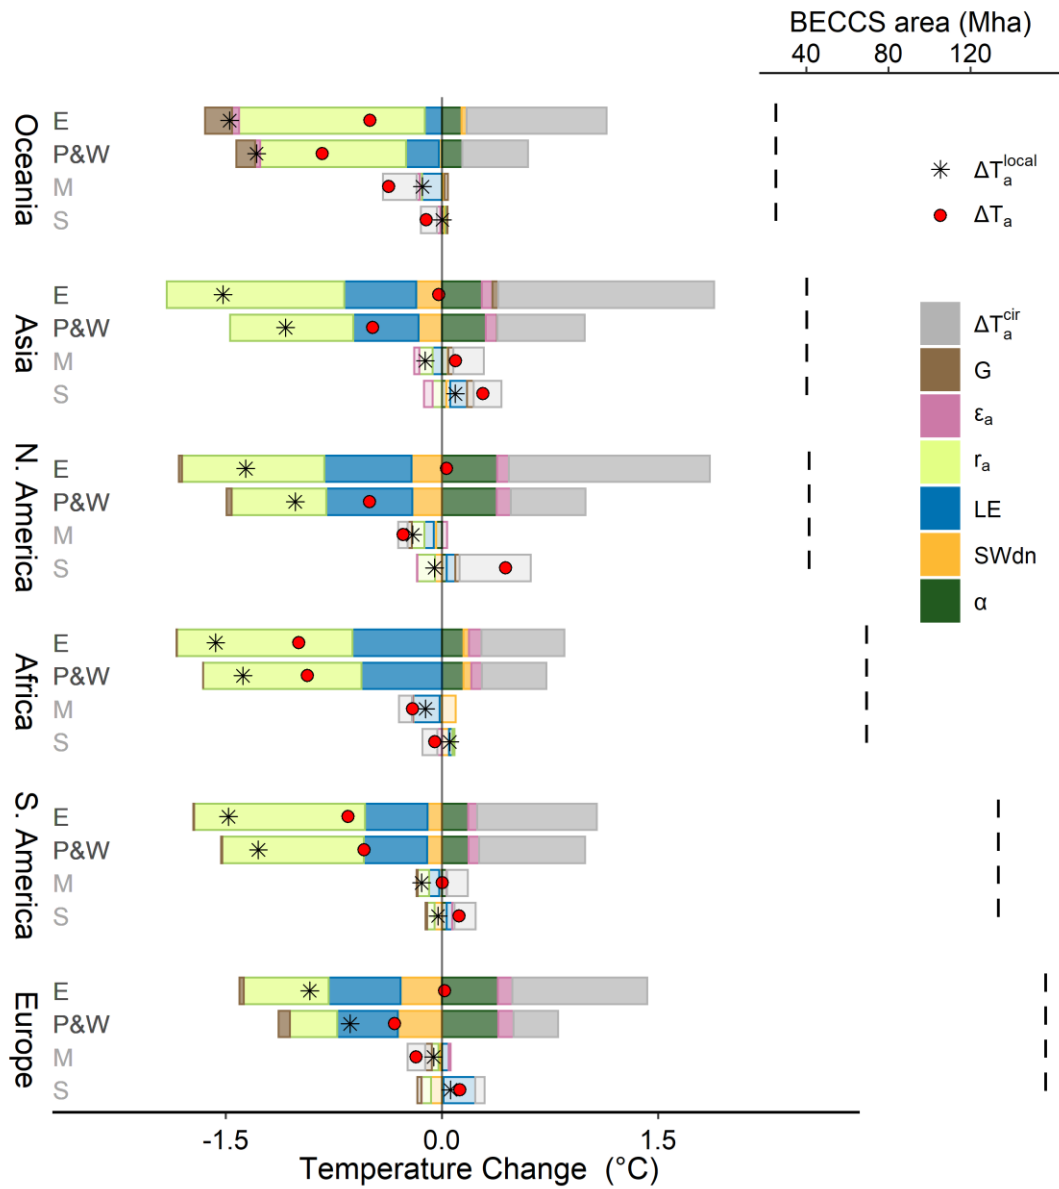

619

620 **Supplementary Figure 27.** Same as **Supplementary Figure 26** but for the BECCS  
 621 regions.

622

623

624

625

626

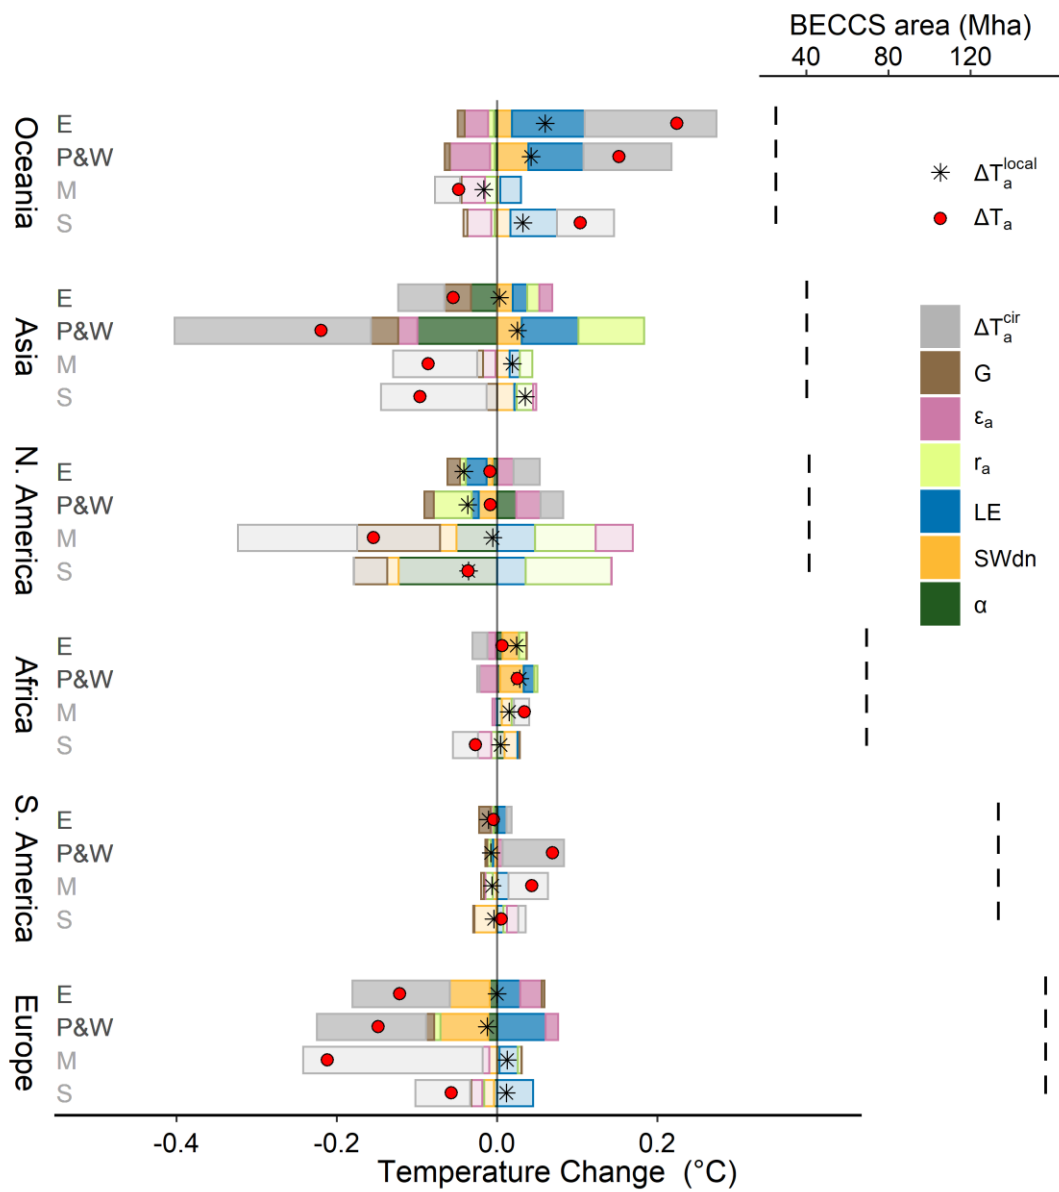

627

628 **Supplementary Figure 28.** Same as **Supplementary Figure 26** but outside the  
 629 BECCS regions.

630

631

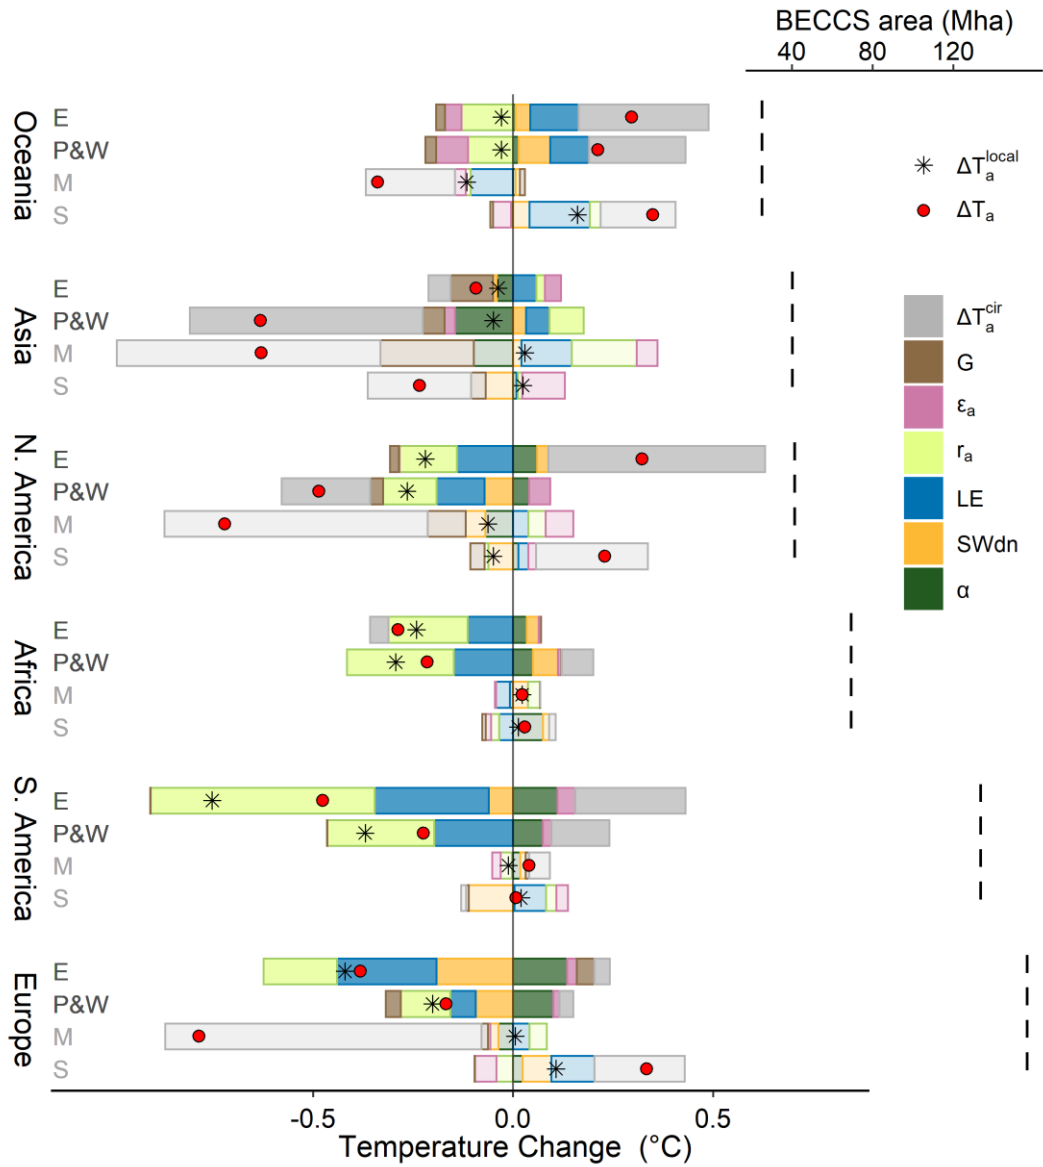

632

633 **Supplementary Figure 29.** Same as **Supplementary Figure 26** but for the grid cells  
 634 with significant temperature changes in each scenario (i.e., grid cells with black shading  
 635 in **Figure 1c-f**).

636

637

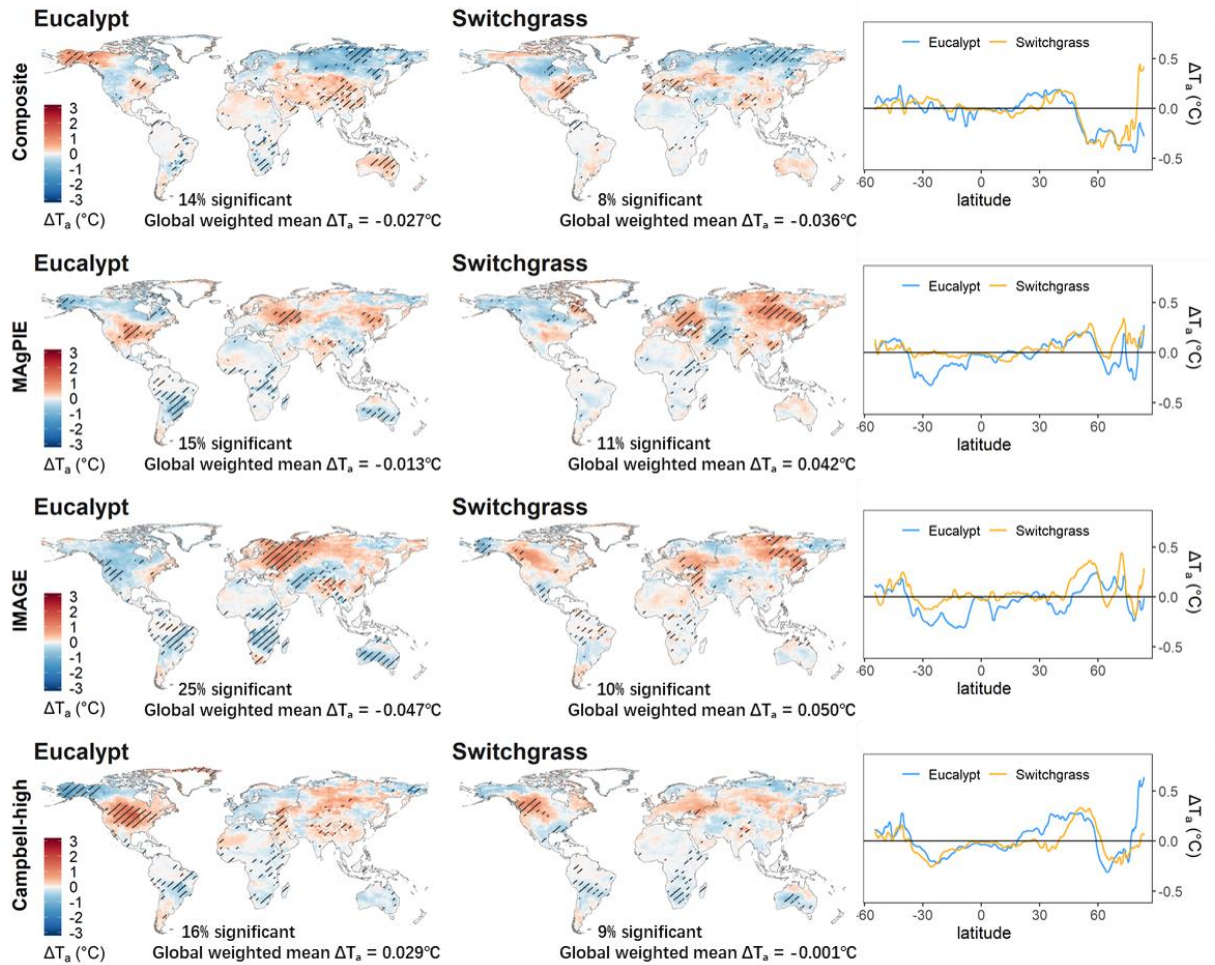

638

639 **Supplementary Figure 30.** Air temperature changes induced by cultivation of eucalypt  
 640 and switchgrass based on various cultivation maps. Each row shows the results from  
 641 one cultivation map (i.e., the composite map, and the individual maps from MAgPIE,  
 642 IMAGE and Campbell-high). The left and middle columns are the spatial distribution  
 643 of  $\Delta T_a$  induced by cultivating eucalypt and switchgrass, and the zonal averages are  
 644 shown in the right column. Black shading in the spatial distributions of  $\Delta T_a$  indicates  
 645 grid cells with a significant difference ( $p < 0.1$ ) in  $\Delta T_a$ .

646

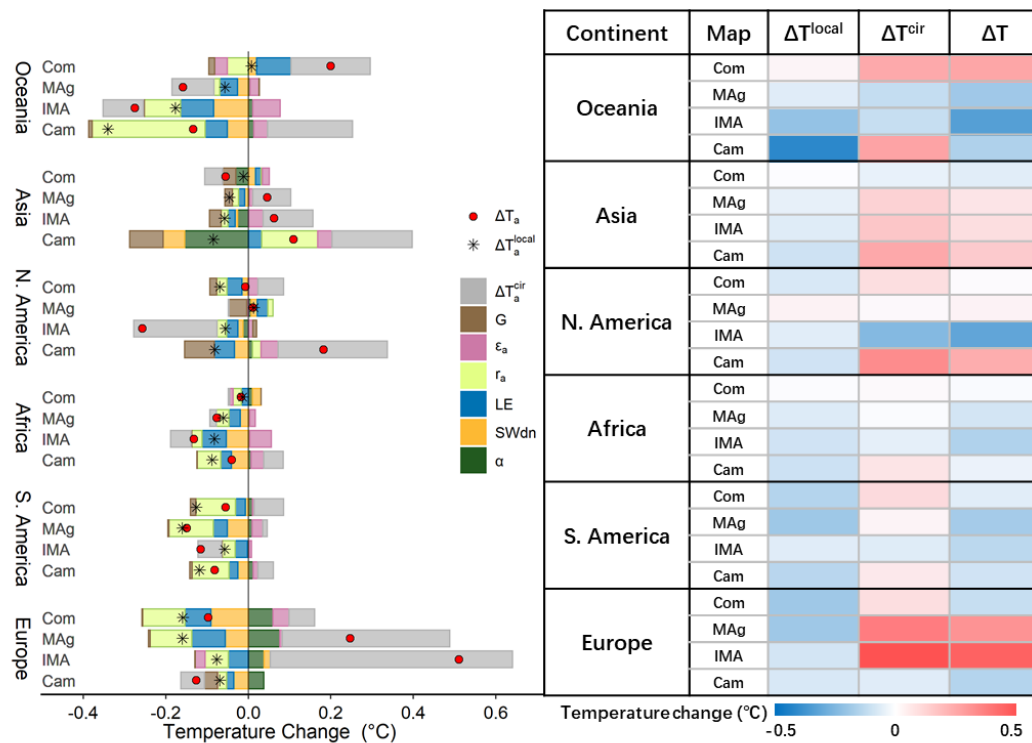

647

648 **Supplementary Figure 31.** Contributions of different components to air temperature  
 649 changes at the continental scale for the eucalypt cultivation. Symbols in the bar plot are  
 650 the same as in **Figure 2**. The table on the right shows temperature change (blue for  
 651 cooling and red for warming) in each continent for different cultivation maps (“Com”  
 652 for the composite map, “MAg” for MAgPIE, “IMA” for IMAGE, and “Cam” for  
 653 Campbell-high).

654

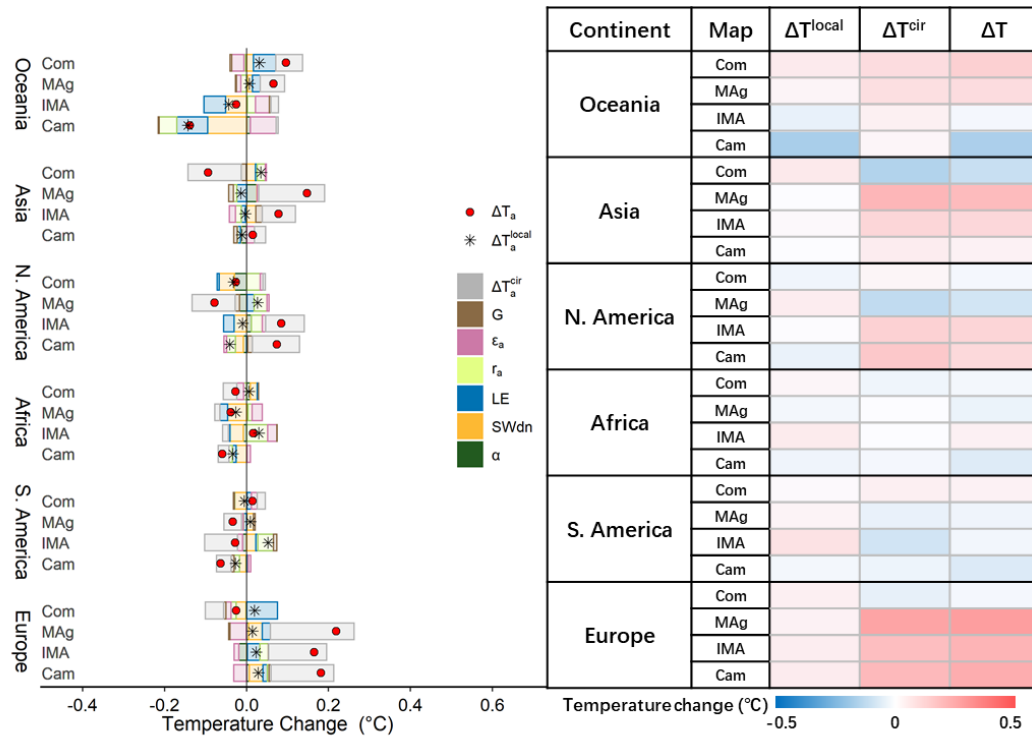

655

656 **Supplementary Figure 32.** Same as **Supplementary Figure 31**, but for the  
 657 switchgrass cultivation.

658

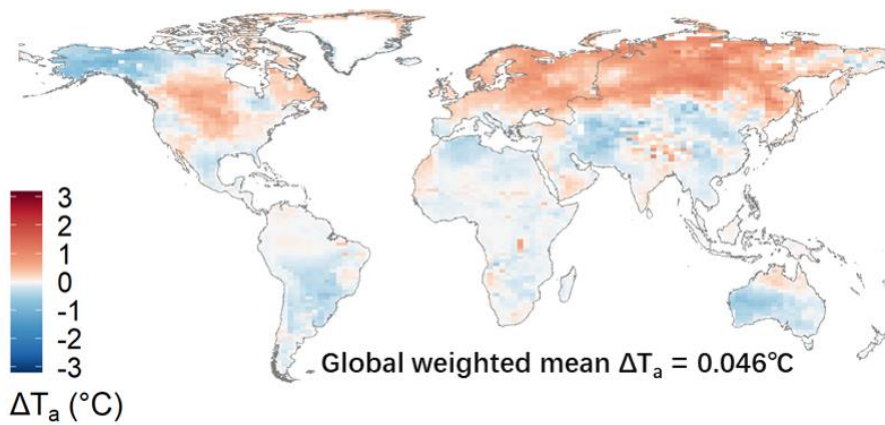

659

660 **Supplementary Figure 33.** Difference in air temperature between two reference  
 661 simulations ( $S_{\text{ref}} - S_{\text{ref}}^{\text{pre}}$ ).

662

663

664

665

666

## 667 **References**

668 1. Boucher, O. et al. Presentation and Evaluation of the IPSL - CM6A - LR Climate Model. *J. Adv.*  
669 *Model. Earth Sy.* **12**, (2020).

670 2. Krinner, G. et al. A dynamic global vegetation model for studies of the coupled atmosphere-  
671 biosphere system. *Global Biogeochem. Cy.* **19**, (2005).

672 3. Hourdin, F. et al. The LMDZ4 general circulation model: climate performance and sensitivity to  
673 parametrized physics with emphasis on tropical convection. *Clim. Dynam.* **27**, 787-813 (2006).

674 4. Contoux, C., Ramstein, G. & Jost, A. Modelling the mid-Pliocene Warm Period climate with the  
675 IPSL coupled model and its atmospheric component LMDZ5A. *Geosci. Model Dev.* **5**, 903-917  
676 (2012).

677 5. Li, W. et al. ORCHIDEE-MICT-BIOENERGY: an attempt to represent the production of  
678 lignocellulosic crops for bioenergy in a global vegetation model. *Geosci. Model Dev.* **11**, 2249-  
679 2272 (2018).

680 6. Li, W., Ciais, P., Makowski, D. & Peng, S. A global yield dataset for major lignocellulosic  
681 bioenergy crops based on field measurements. *Scientific Data.* **5**, 180169 (2018).

682 7. Li, Y., Piao, S., Chen, A., Ciais, P. & Li, L. Z. X. Local and teleconnected temperature effects of  
683 afforestation and vegetation greening in China. *National Science Review.* **7**, 897-912 (2020).

684 8. Zeng, Z. et al. Climate mitigation from vegetation biophysical feedbacks during the past three  
685 decades. *Nat. Clim. Change.* **7**, 432-436 (2017).

686 9. Pastorello, G. et al. The FLUXNET2015 dataset and the ONEFlux processing pipeline for eddy  
687 covariance data. *Scientific Data.* **7**, (2020).

688 10. Cai, H. et al. Consideration of land use change-induced surface albedo effects in life-cycle analysis  
689 of biofuels. *Energ. Environ. Sci.* **9**, 2855-2867 (2016).

690 11. Luysaert, S. et al. Trade-offs in using European forests to meet climate objectives. *Nature.* **562**,  
691 259-262 (2018).

692 12. Georgescu, M., Lobell, D. B. & Field, C. B. Direct climate effects of perennial bioenergy crops in  
693 the United States. *P. Natl. Acad. Sci. Usa.* **108**, 4307-4312 (2011).

694 13. Robertson, G. P. et al. Cellulosic biofuel contributions to a sustainable energy future: Choices and  
695 outcomes. *Science.* **356**, (2017).

696 14. Kang, S. et al. Marginal Lands: Concept, Assessment and Management. *J. Agr. Sci.* **5**, 129-139  
697 (2013).

698 15. Tang, Y., Xie, J. S. & Geng, S. Marginal Land-based Biomass Energy Production in China. *J. Integr.*  
699 *Plant Biol.* **052**, 112-121 (2010).

700 16. Campbell, J. E., Lobell, D. B., Genova, R. C. & Field, C. B. The Global Potential of Bioenergy on  
701 Abandoned Agriculture Lands. *Environ. Sci. Technol.* **42**, 5791-5794 (2008).

702 17. Cai, X., Zhang, X. & Wang, D. Land Availability for Biofuel Production. *Environmental Science*  
703 *& Technology: ES&T.* **45**, 334-339 (2011).

704 18. Popp, A. et al. Land-use transition for bioenergy and climate stabilization: model comparison of

- 705 drivers, impacts and interactions with other land use based mitigation options. *Climatic Change*.  
706 **123**, 495-509 (2014).
- 707 19. Stehfest, E. et al. Integrated assessment of global environmental change with IMAGE 3.0: Model  
708 description and policy applications. *Netherlands Environmental Assessment Agency (PBL)*, (2014).
- 709 20. Goldewijk, K. K. Estimating global land use change over the past 300 years: The HYDE Database.  
710 *Global Biogeochem. Cy.* **15**, 417-433 (2001).
- 711 21. Klein Goldewijk, K., Beusen, A., Van Drecht, G. & De Vos, M. The HYDE 3.1 spatially explicit  
712 database of human-induced global land-use change over the past 12,000 years. *Global Ecol.*  
713 *Biogeogr.* **20**, 73-86 (2011).
- 714 22. Peng, S. et al. Benchmarking the seasonal cycle of CO<sub>2</sub> fluxes simulated by terrestrial ecosystem  
715 models. *Global Biogeochem. Cy.* **29**, 46-64 (2015).
- 716 23. Canadell, J. et al. Maximum rooting depth of vegetation types at the global scale. *Oecologia*. **108**,  
717 583-595 (1996).
- 718 24. Kala, J. et al. Influence of Leaf Area Index Prescriptions on Simulations of Heat, Moisture, and  
719 Carbon Fluxes. *J. Hydrometeorol.* **15**, 489-503 (2014).
- 720 25. Ramstein, G., Serafini-Le Treut, Y., Le Treut, H., Forichon, M. & Joussaume, S. Cloud processes  
721 associated with past and future climate changes. *Clim. Dynam.* **14**, 233-247 (1998).
- 722 26. Bourgeois, Q. et al. Ubiquity and impact of thin mid-level clouds in the tropics. *Nat. Commun.* **7**,  
723 12432 (2016).
- 724 27. Xu, X., Riley, W. J., Koven, C. D., Jia, G. & Zhang, X. Earlier leaf-out warms air in the north. *Nat.*  
725 *Clim. Change.* **10**, 370-375 (2020).
- 726 28. Graham, E. A., Mulkey, S. S., Kitajima, K., Phillips, N. G. & Wright, S. J. Cloud cover limits net  
727 CO<sub>2</sub> uptake and growth of a rainforest tree during tropical rainy seasons. *P. Natl. Acad. Sci. Usa.*  
728 **100**, 572-576 (2003).
- 729 29. Chen, T., Rossow, W. B. & Zhang, Y. Radiative Effects of Cloud-Type Variations. *J. Climate.* **13**,  
730 264-286 (2000).
- 731 30. MacDougall, A. H. The Transient Response to Cumulative CO<sub>2</sub> Emissions: a Review. *Current*  
732 *Climate Change Reports.* **2**, 39-47 (2016).
- 733 31. Tokarska, K. B. et al. Recommended temperature metrics for carbon budget estimates, model  
734 evaluation and climate policy. *Nat. Geosci.* **12**, 964-971 (2019).
- 735 32. Gillett, N. P., Arora, V. K., Matthews, D. & Allen, M. R. Constraining the Ratio of Global Warming  
736 to Cumulative CO<sub>2</sub> Emissions Using CMIP5 Simulations\*. *J. Climate.* **26**, 6844-6858 (2013).
- 737 33. Matthews, H. D., Gillett, N. P., Stott, P. A. & Zickfeld, K. The proportionality of global warming  
738 to cumulative carbon emissions. *Nature.* **459**, 829-832 (2009).
- 739
